1       **Title**

2       Human intestinal tissue-resident memory CD8+ T cells comprise transcriptionally  
3 and functionally distinct subsets

4

5       **Authors (full names and institutions)**

6       Michael E.B. FitzPatrick<sup>1\*</sup>, Nicholas M. Provine<sup>1\*</sup>, Lucy C. Garner<sup>1\*</sup>, Kate Powell<sup>2</sup>, Ali  
7 Amini<sup>1</sup>, Sophie Irwin<sup>1</sup>, Helen Ferry<sup>1</sup>, Tim Ambrose<sup>1,3</sup>, Peter Friend<sup>3</sup>, Georgios Vrakas<sup>3</sup>,  
8 Srikanth Reddy<sup>3</sup>, Elizabeth Soilleux<sup>4</sup>, Paul Klenerman<sup>1,2,5†</sup>, Philip J. Allan<sup>1,3,5</sup>

9

10       \*MF, NP, and LG contributed equally to this paper

11       †Corresponding author

12

13       1 Translational Gastroenterology Unit, Nuffield Department of Medicine, University of  
14 Oxford, Oxford, UK

15       2 Peter Medawar Building for Pathogen Research, University of Oxford, UK

16       3 Oxford Transplant Centre, Oxford University Hospitals NHS Foundation Trust,  
17 Churchill Hospital, Oxford, UK

18       4 Division of Cellular and Molecular Pathology, Addenbrooke's Hospital, Cambridge,  
19 UK

20       5 NIHR Biomedical Research Centre, John Radcliffe Hospital, Oxford, UK

21

22

23

24        **Summary**

25        Heterogeneity within human tissue-resident memory T ( $T_{RM}$ ) cells is poorly  
26 understood. We show that transcriptionally, phenotypically, and functionally distinct  
27  $CD4^+$  and  $CD8^+$   $T_{RM}$  subsets exist in the human intestine, and that  $\beta 2$ -integrin  
28 expression identifies a distinct population of  $CD8^+$   $T_{RM}$  cells.

29

30        **Abstract**

31        Tissue-resident memory T ( $T_{RM}$ ) cells provide key adaptive immune responses in  
32 infection, cancer, and autoimmunity. However transcriptional heterogeneity of human  
33 intestinal  $T_{RM}$  cells remains undefined, and definitive markers of  $CD103^-$   $T_{RM}$  cells are  
34 lacking. Here, we investigated transcriptional and functional heterogeneity of human  
35  $T_{RM}$  cells through the study of donor-derived intestinal  $T_{RM}$  cells from intestinal  
36 transplant recipients. Single-cell transcriptional profiling identified four conventional  $T_{RM}$   
37 populations, with two distinct transcriptional states of  $CD8^+$   $T_{RM}$  cells, delineated by  
38 *ITGAE* and *ITGB2* expression. We defined a transcriptional signature discriminating the  
39 two  $CD8^+$  populations, including differential expression of key residency-associated  
40 genes and cytotoxic molecules. Flow cytometry of recipient-derived cells infiltrating the  
41 graft and intestinal lymphocytes from healthy gut confirmed the two  $CD8^+$   $T_{RM}$   
42 phenotypes, with  $\beta 2$ -integrin acting as a  $CD103^-$   $CD8^+$   $T_{RM}$  marker.  $CD103^+$   $CD8^+$   $T_{RM}$   
43 cells produced IL-2, and demonstrated greater polyfunctional cytokine production, while  
44  $\beta 2$ -integrin $^+$   $CD69^+$   $CD103^-$   $T_{RM}$  cells had higher granzyme expression. Phenotypic and  
45 functional analysis of intestinal  $CD4^+$  T cells identified many parallels, including a  
46 distinct  $\beta 2$ -integrin $^+$  population. Together, these results describe the transcriptional,

47 phenotypic, and functional heterogeneity of human intestinal T<sub>RM</sub> cells, and suggest a  
48 role for  $\beta$ 2-integrin in T<sub>RM</sub> development.

49

## 50 **Introduction**

51 Tissue-resident memory T (T<sub>RM</sub>) cells are a subset of long-lived T cells that reside in  
52 tissue and do not recirculate (Mackay and Kallies, 2017; Szabo et al., 2019). T<sub>RM</sub>  
53 populations provide rapid, *in situ* adaptive protection against a wide spectrum of  
54 pathogens (Gebhardt et al., 2011; Schenkel et al., 2014). T<sub>RM</sub> cells also have key roles  
55 in cancer immune surveillance (Park et al., 2019), and are implicated in autoimmunity,  
56 including inflammatory bowel disease (IBD) and coeliac disease (Zundler et al., 2019;  
57 Mayassi et al., 2019). CD8<sup>+</sup> T<sub>RM</sub> cells have potent cytotoxic functions and produce pro-  
58 inflammatory cytokines to trigger innate and adaptive immune responses (Ariotti et al.,  
59 2014).

60

61 Murine work has advanced our understanding of T<sub>RM</sub> cells substantially, however  
62 T<sub>RM</sub> phenotype, transcriptional profiles, and genetic regulation differ between mice and  
63 humans (Oja et al., 2017; Hombrink et al., 2016; Kumar et al., 2017). Until recently,  
64 human studies of T<sub>RM</sub> biology were hampered by the inability to prove long-lived tissue  
65 residency, with surface molecules CD69 and CD103 ( $\alpha$ E integrin) used as surrogate  
66 T<sub>RM</sub> markers. These were used to identify the putative transcriptional signature of  
67 human T<sub>RM</sub> cells, with CD69 hypothesised as the key residency marker (Kumar et al.,  
68 2017). However, this gene signature was derived from bulk populations, so it remains  
69 unclear if there are transcriptionally distinct subsets within human T<sub>RM</sub> cells.

70

71 Despite its expression on almost all murine and human T<sub>RM</sub> cells, the use of CD69  
72 as a residency marker has recently been questioned. CD69 restricts lymphocyte tissue  
73 egress via S1P1 inhibition, but is not required for the development of functional T<sub>RM</sub>  
74 cells in mice (Shiow et al., 2006; Walsh et al., 2019). CD69 can be induced via  
75 stimulation, and a proportion of CD69+ T cells in tissue are not resident, making CD69 a  
76 suboptimal residency marker (Shiow et al., 2006; Sancho et al., 2005; Beura et al.,  
77 2018). Therefore, additional phenotypic markers to identify CD103- T<sub>RM</sub> populations are  
78 required.

79

80 Recent work has exploited the human model of organ transplantation to study long-  
81 lived donor-derived T cells, which are definitive functionally resident T<sub>RM</sub> cells (Zuber et  
82 al., 2016; Bartolomé-Casado et al., 2019; Snyder et al., 2019). Studies using this  
83 approach have demonstrated persistence of clonally-identical intestinal CD8+ T<sub>RM</sub> cells  
84 for up to 1 year in the small intestine (SI) (Bartolomé-Casado et al., 2019), and of donor-  
85 derived T cells for 600 days post-transplant (Zuber et al., 2016). This approach was also  
86 used to identify putative SI CD8+ T<sub>RM</sub> cell subsets based on expression of CD103 and  
87 KLRG1, with differences in clonality, granzyme expression, and cytokine production  
88 (Bartolomé-Casado et al., 2019). However, it remains unclear whether these cell  
89 populations represent transcriptionally distinct subsets.

90

91 This work sought to examine the heterogeneity within functionally resident donor-  
92 derived T cells in intestinal transplantation using flow cytometry and single-cell RNA



93 sequencing (scRNAseq). We confirmed that SI CD4<sup>+</sup> and CD8<sup>+</sup> T<sub>RM</sub> cells can persist  
94 for 5 years post-transplant. scRNAseq identified conventional and regulatory CD4<sup>+</sup> T<sub>RM</sub>  
95 cell populations, as well as two transcriptionally distinct CD8<sup>+</sup> T<sub>RM</sub> subsets, which  
96 differed in expression of *ITGAE* (CD103, αE integrin) and *ITGB2* (CD18, β2-integrin).  
97 These two populations differentially expressed putative T<sub>RM</sub>-associated genes,  
98 indicating that the gene signatures derived from bulk RNAseq data may be a synthesis  
99 of several transcriptomic profiles. We validated this phenotypic and functional  
100 heterogeneity in the healthy intestine, with increased β2-integrin expression and  
101 distinctive effector function in CD103<sup>-</sup> T<sub>RM</sub> cells. CD69, β2-integrin, and CD103  
102 expression altered with time post-transplant on recipient-derived graft-infiltrating CD8<sup>+</sup> T  
103 cell populations, consistent with acquisition of T<sub>RM</sub> status. We conclude that CD69<sup>+</sup>  
104 CD103<sup>-</sup> β2-integrin<sup>+</sup> CD8<sup>+</sup> intestinal T cells are a transcriptionally and functionally  
105 distinct T<sub>RM</sub> population, and suggest that β2-integrin can serve as a proxy surface  
106 marker for the CD103<sup>-</sup> CD8<sup>+</sup> T<sub>RM</sub> population.

107

## 108 **Results and discussion**

109

### 110 ***Long-lived conventional CD4<sup>+</sup> and CD8<sup>+</sup> T cells, but not innate-like*** 111 ***populations, persist long-term in the human intestine***

112

113 To examine the persistence of resident T cells in the small intestine (SI) post-  
114 transplant, we used HLA allele congenic cell tracking, a method allowing discrimination  
115 of donor- and recipient-derived cells following transplantation using fluorophore-

116 conjugated antibodies to discordant Class I HLA haplotypes (Fig. 1A, Supplemental Fig.  
117 1A) (Zuber et al., 2016; Bartolomé-Casado et al., 2019). The presence of SI donor- and  
118 recipient-derived T cells *in situ* was confirmed by chip cytometry (Fig. 1B)(Leng et al.,  
119 2019).

120

121 Infiltration of recipient-derived T cells into the graft increased over time, with striking  
122 heterogeneity (Fig. 1C). Current or previous rejection was associated with higher  
123 proportions of recipient-derived T cells in the graft (Fig. 1D), consistent with prior work  
124 (Zuber et al., 2016). Conversely, two individuals had persistent donor-derived SI T cell  
125 populations at 4 years 7 months (1684 days) and 5 years 1 month (1865 days) post-  
126 transplant (Fig. 1E, and data not shown). This extends previous reports of long-lived  
127 donor-chimerism in the human intestine (Zuber et al., 2016; Bartolomé-Casado et al.,  
128 2019).

129

130 Haematopoietic stem and progenitor cells can persist in the intestinal transplant  
131 graft, sometimes leading to long-term chimerism of donor-derived populations in blood  
132 (Fu et al., 2019). This could allow persistence of donor-derived T cells in the graft  
133 through continuous ingress from blood, rather than via residency (Bartolomé-Casado et  
134 al., 2019). Contrasting with the work of Fu *et al.*, flow cytometric analysis of blood  
135 collected from transplant recipients at the time of biopsy revealed the percentage of  
136 circulating donor origin T cells was extremely low beyond 3 months post-transplant  
137 (median 0.042%, 95% CI 0-1.22%; Fig. 1F). This is far below the posited cut-off for  
138 macrochimerism of 4% in previous work (Fu et al., 2019), and similar to background

139 non-specific staining in non-transplant recipients (0.01-0.12%; Supplemental Fig. 1B),  
140 suggesting against continuous replacement as a confounding mechanism for sustained  
141 donor chimerism. This discrepancy in circulating chimerism between studies may be  
142 due to differences in transplant procedure (multi-visceral vs isolated intestinal transplant  
143 in this study) and recipient age (paediatric vs adult in this study) (Zuber et al., 2015; Fu  
144 et al., 2019).

145  
146 Conventional CD4+ and CD8+ T cells dominated in the graft post-transplant (Fig.  
147 1G), and demonstrated similar kinetics of recipient-derived replacement with time (Fig.  
148 1H). We also examined the dynamics of unconventional T cell subsets post-transplant,  
149 as their residency characteristics in humans are poorly understood (Supplemental Fig.  
150 1C). CD161+V $\alpha$ 7.2+CD8+ T cells (consistent with mucosal-associated invariant T  
151 (MAIT) cells), and V $\delta$ 2+  $\gamma\delta$  T cells (which possess analogous innate-like functions to  
152 MAIT cells (Provine et al., 2018; Gutierrez-Arcelus et al., 2019)) were rare in the graft  
153 post-transplant, recovering to expected frequencies after 1 year (Fig, 1I) . However, the  
154 non-V $\delta$ 2  $\gamma\delta$  T cell subsets demonstrated different dynamics, with this population present  
155 at early timepoints. Unconventional T cell subsets demonstrated similar replacement  
156 kinetics (Fig. 1J). It is unclear if the low innate-like T cell frequency post-transplant is  
157 due to differences in residency characteristics, or to increased sensitivity to the  
158 ischaemic insult of surgery or perioperative conditioning regimes.

159  
160 We examined CD69 and CD103 expression on donor- and recipient-derived CD4+  
161 and CD8+ T cell populations in the intestinal graft. CD103 expression was restricted to

162 CD69+ cells, with a greater proportion of CD8+ cells expressing CD103 than CD4+  
163 cells(Fig. 1K), in keeping with prior work (Kumar et al., 2017). Donor-derived T cells  
164 showed near-ubiquitous expression of CD69 consistent with a lack of recent migration  
165 from blood, and had fewer CD69- cells than recipient-derived populations for both CD8+  
166 (median 0.03% vs 4.17%,  $p < 0.0001$ , Wilcoxon signed rank test) and CD4+ cells  
167 (median 0.10% vs 5.65%,  $p < 0.0001$ , Wilcoxon signed rank test) (Fig. 1L). This suggests  
168 that CD69- T cells in the SI are not functionally resident in humans, in contrast to recent  
169 murine data which showed no functional requirement for CD69 to establish intestinal  
170 residency (Walsh et al., 2019). Recipient-derived CD4+ and CD8+ T cell populations  
171 showed increasing expression of CD103 with time, consistent with the acquisition of a  
172  $T_{RM}$  phenotype, as in prior work (Zuber et al., 2016). We have previously shown higher  
173 expression of the C-type lectin-like receptor CD161 on intestinal CD103+ CD8+ T cells  
174 (Fergusson et al., 2015); here a greater proportion of donor-derived CD8+ T cells  
175 expressed CD161, consistent with an association with residency (Supplemental Fig.  
176 1D,E).

177

178 ***Single-cell RNA sequencing delineates transcriptionally distinct states within***

179 ***CD4+ and CD8+  $T_{RM}$  populations***

180

181 The persistence of CD103- and CD103+ donor-derived T cells up to five years post-  
182 transplant, and the enrichment of CD103+ recipient-derived T cells at later time points,  
183 raised the possibility that CD103- and CD103+ T cells represented distinct cell states.  
184 To test this hypothesis, we performed droplet-based scRNAseq of sorted donor-derived

185 graft-resident T<sub>RM</sub> cells from a single subject one year post-transplant (Experiment 1,  
186 Fig. 2A). 1,774 cells were captured and sequenced, with 974 cells remaining after  
187 filtering (Supplemental Fig. 2A).

188

189 Four transcriptionally distinct clusters were identified (Fig. 2B): conventional CD4+ T  
190 cells, regulatory CD4+ T cells expressing *IL2RA* and *FOXP3*, and two clusters of  
191 conventional CD8+ T cells (Fig. 2C). The differentially expressed genes (DEGs)  
192 between the two populations of donor-derived CD8+ T<sub>RM</sub> cells (hereafter CD8+  
193 population 1 and 2) were analysed (Fig. 2D). Population 1 expressed *ITGAE* (CD103),  
194 as well as higher levels of *CD7*, *IL7R* (CD127), *KLRB1* (CD161), and the chemokine  
195 receptor *CCR6* (Fig. 2E). IL-7, a stromal-derived homeostatic cytokine which provides  
196 survival and proliferative signals to lymphocytes (Raeber et al., 2018), is required for  
197 epidermal T<sub>RM</sub> persistence (Adachi et al., 2019), and *CD127* is highly expressed in SI  
198 memory T cells (Thome et al., 2014). The differential expression of *IL7R* suggests  
199 differences in the mechanisms, or nature, of T<sub>RM</sub> persistence between the two  
200 populations (Raeber et al., 2018).

201

202 Conversely, CD8+ population 2 expressed low levels of *ITGAE*, but high levels of  
203 *KLRG1*, as well as cytotoxic granzyme molecules and class II MHC molecules (Fig.  
204 2D,E). Surface *KLRG1* expression can delineate two putative SI CD103- CD8+ T cell  
205 subsets with similar residency characteristics (Bartolomé-Casado et al., 2019).  
206 However, population 2 did not sub-cluster further based on *KLRG1* gene expression,  
207 suggesting that these are not transcriptionally distinct states. Of particular interest, the

208 integrin *ITGB2* ( $\beta$ 2-integrin/CD18), was highly expressed by the CD103- CD8+  
209 population 2.  $\beta$ 2-integrin can form heterodimers with four  $\alpha$ -integrins (Fagerholm et al.,  
210 2019), only one of which, *ITGAL* (CD11a), was detected in the dataset. *ITGAL* was  
211 highly expressed on the CD103- CD8+ population 2 (Supplemental Fig. 2B,C).

212

213 ***CD8+ CD103+ and CD103-ITGB2hi T<sub>RM</sub> subsets differ in expression of putative***  
214 ***residency-associated genes***

215

216 Transcriptional signatures associated with human tissue residency have been  
217 defined, most thoroughly by bulk RNA sequencing of CD69- and CD69+ T cells from  
218 multiple tissues (Kumar et al., 2017). This T<sub>RM</sub> gene set was explored in the two CD8+ T  
219 cell populations. The genes downregulated in CD69+ T cells were either not detected,  
220 or found at low levels in both clusters (Supplemental Fig. 2D,E). However, several T<sub>RM</sub>-  
221 associated genes upregulated in CD69+ T cells were differentially expressed between  
222 the two clusters, with population 1 expressing higher levels of *ITGAE* and *ITGA1* (in  
223 agreement with work on renal T<sub>RM</sub> cells (de Leur et al., 2019)), and population 2  
224 expressing higher levels of *CRTAM* (Fig. 2F, Supplemental Fig. 2F). In addition,  
225 *ZNF683* (Hobit), a transcriptional regulator of residency in mice (Mackay et al., 2016),  
226 was more highly expressed in population 1. These data indicate that previously  
227 identified T<sub>RM</sub> gene signatures may represent an amalgamation of several distinct T<sub>RM</sub>  
228 transcriptional states.

229

230 To confirm the presence of transcriptionally distinct CD8+ T<sub>RM</sub> states, a second

231 scRNAseq experiment was performed on samples from two further transplant recipients  
232 (Experiment 2, Fig. 2A). Donor-derived CD103<sup>-</sup> and CD103<sup>+</sup> CD8<sup>+</sup> T cells were index-  
233 sorted before plate-based scRNAseq using the Smart-Seq2 protocol (Picelli et al.,  
234 2013). 267 cells were sorted and sequenced, with 196 cells remaining post-filtering  
235 (Supplemental Fig. 2G-I). Three clusters were identified, with cluster 1 predominantly  
236 formed of CD103<sup>-</sup> T cells, and the transcriptionally similar clusters 2 and 3 formed of  
237 CD103<sup>+</sup> T cells (Fig. 2G). Clusters 2 and 3 (CD103<sup>+</sup>) expressed higher levels of  
238 *ITGAE*, *CD7*, and *IL7R*, while cluster 1 (CD103<sup>-</sup>) expressed higher levels of *GZMK*,  
239 *GZMH*, class II HLA molecules, and *ITGB2* (Fig. 2H). *ITGAL*, was also detected in  
240 cluster 1 (Supplemental Fig. 2J).

241

242 Differential expression analysis between cluster 1 and clusters 2 and 3 combined  
243 revealed similar transcriptional differences to those in Experiment 1 (Fig. 2I,  
244 Supplemental Table 2). Comparison of DEGs in the two experiments identified a core  
245 set of 30 genes that distinguished the two populations (Fig. 2I,J).

246

247 Putative T<sub>RM</sub> cell subsets in the context of lung transplantation have been described,  
248 however these did not align with CD103 expression (Snyder et al., 2019), in contrast to  
249 our work. The transcriptional signatures of the clusters were also different in our work,  
250 with the exception of *ZNF683*, which was also associated with one lung T<sub>RM</sub> subset.  
251 These differences may reflect tissue-specific gene signatures in T<sub>RM</sub> cells, differences in  
252 CD4<sup>+</sup> and CD8<sup>+</sup> T<sub>RM</sub> cells, which co-clustered in the previous study of lung T<sub>RM</sub> cells, or  
253 may be an effect of increased cell number in this study, allowing greater power to detect

254 transcriptionally distinct sub-clusters.

255

256 ***CD103+ and CD103- CD8+ T cells display distinct phenotypes in the healthy***  
257 ***intestine***

258

259 The presence of CD103- and CD103+ donor-derived CD8+ T cells in the  
260 transplanted SI mucosa was confirmed using chip cytometry (Fig. 3A). Flow cytometry  
261 of donor-derived T cells demonstrated differences in expression of CD161,  $\beta$ 2 integrin,  
262 and granzyme K between CD103- and CD103+ CD8+ T cells, consistent with  
263 scRNAseq data (Supplementary Fig. 3A).

264

265 To validate the phenotypic differences between the two putative SI CD8+ T<sub>RM</sub>  
266 subsets outside the transplant setting, we performed flow cytometry of SI T cells from  
267 healthy donors. CD8+ SI T cells expressing both CD69 and CD103 predominated,  
268 representing 88.9% (81.7-96.0%) of CD8+ T cells, with no difference seen between SI  
269 location (Supplementary Fig. 3B).

270

271 CD103+ CD8+ T cells expressed higher levels of CD161 and CD127 (IL7R)  
272 compared with the CD69- or CD69+CD103- cells, consistent with the transcriptomic  
273 data (Fig. 3B,C). CD7 expression was higher on all CD69+ T cells, with no difference  
274 seen between CD69+CD103- and CD69+CD103+ populations. In contrast,  
275 CD69+CD103- CD8+ T cells expressed higher levels of  $\beta$ 2-integrin, granzyme K, and  
276 KLRG1 than either CD69- cells or CD69+CD103+ cells.



277

278 Ki-67 expression formed a gradient between the three populations, with higher  
279 expression in the CD69- population, and a trend towards increased Ki67 expression in  
280 CD69+CD103- CD8+ T cells compared to CD103+ CD8+ T cells (mean 14.88% vs  
281 5.72%, 1-way ANOVA and Tukey's multiple comparisons test, P=0.067). This is  
282 consistent with prior work indicating that T<sub>RM</sub> cell persistence is due to longevity rather  
283 than *in situ* proliferation (Thome et al., 2014).

284

285 ***Graft-infiltrating, recipient-derived T cells take on a T<sub>RM</sub> phenotype over time,***  
286 ***with CD103+ and CD103- CD8+ T cells displaying distinct phenotypes***

287

288 To explore the dynamics of T<sub>RM</sub> phenotype acquisition, we examined graft-  
289 infiltrating, recipient-derived T cells. In the early post-transplant period, 52.7% of  
290 infiltrating CD8+ T cells lacked CD69 expression, with acquisition of the CD69+ CD103+  
291 T<sub>RM</sub> phenotype over time (Fig. 3D). At later times post-transplant, CD103- and CD103+  
292 populations clearly differed in phenotype, consistent with the two subsets seen in  
293 healthy SI. CD161 expression was higher on CD103+ CD8+ T cells than CD69+CD103-  
294 T cells, and granzyme K expression was higher on CD69+CD103- CD8+ T cells (Fig.  
295 3E-H). A similar gradient of Ki-67 expression between the populations was seen (Fig.  
296 3F). In addition, graft-infiltrating CD69+CD103- CD8+ T cells demonstrated higher  
297 expression of  $\beta 2$  integrin than either CD69- or CD103+ populations (Fig. 3I).  $\beta 2$  integrin  
298 expression is constitutively high on circulating T cells (Fig. 3J), as LFA-1 is involved in  
299 tissue entry via ICAM-1 (Fagerholm et al., 2019). These data suggest that  $\beta 2$  integrin

300 surface expression is reduced on recent tissue immigrants, before subsequent up  
301 regulation on CD69+CD103- T<sub>RM</sub> cells, but not on CD103+ T<sub>RM</sub> cells. Recipient-derived  
302 CD8+ T cells infiltrating the graft in the early post-transplant period displayed less clear  
303 distinctions between populations, although the small number of samples precluded  
304 further analysis.

305

306 ***CD103+ CD8+ intestinal T cells demonstrate greater capacity for cytokine***  
307 ***production***

308

309 To assess cytokine production capacity of these subsets, SI T cells from healthy  
310 controls were stimulated for four hours with PMA+ionomycin, before intracellular flow  
311 cytometry for TNF $\alpha$ , IFN $\gamma$ , IL-2, CCL4, IL-17A, and IL-10. 77% of CD103+ CD8+ T cells  
312 produced at least one cytokine, a greater proportion than CD69+CD103- CD8+ T cells  
313 (47.7% cytokine positive, P<0.0001), and CD69- CD8+ T cells (37% cytokine positive,  
314 P<0.0001) (Fig. 4A-F). CD69+ populations produced more TNF $\alpha$  and IFN $\gamma$  than CD69-  
315 cells, irrespective of CD103 expression (Fig. 4A,B). While scRNAseq data indicated  
316 increased *CCL4* transcripts in CD69+CD103- CD8+ T cells, CCL4 production following  
317 stimulation was not different between the two CD69+ populations (Fig. 4C).

318

319 CD103+ CD8+ T cells expressed more IL-2 than either CD69+CD103- or CD69-  
320 populations (Fig. 4D). Hepatic CD103+ CD8+ T<sub>RM</sub> cells also produce increased IL-2  
321 (Pallett et al., 2017). Autocrine IL-2 production is critical to secondary proliferative  
322 responses and IFN $\gamma$  production in CD8+ T cells (Feau et al., 2011), and may be of

323 particular relevance to intra-epithelial lymphocyte populations, where the infrequent  
324 CD4<sup>+</sup> T cells may provide suboptimal help (Zimmerli et al., 2005).

325

326 There was a spectrum of functionality between the three populations, with CD69-  
327 CD8<sup>+</sup> T cells predominantly non- or mono-functional, CD103<sup>+</sup> CD8<sup>+</sup> T cells  
328 predominantly polyfunctional, and CD69<sup>+</sup>CD103<sup>-</sup> CD8<sup>+</sup> T cells showing intermediate  
329 functionality (Fig. 4E,F), consistent with a prior report (Bartolomé-Casado et al., 2019).  
330 Quadruple functional cells were more common in the CD103<sup>+</sup> population than in the  
331 CD69<sup>+</sup>CD103<sup>-</sup> population (21.76% vs 10.32%, P<0.0001), and were near-absent in the  
332 CD69<sup>-</sup> population (0.38%). These results demonstrate that the transcriptionally distinct  
333 CD103<sup>-</sup> and CD103<sup>+</sup> CD8<sup>+</sup> T<sub>RM</sub> populations differ functionally and phenotypically, with  
334 CD103<sup>+</sup> CD8<sup>+</sup> populations more polyfunctional, and producing IL-2.

335

336 ***CD103<sup>+</sup> and CD103<sup>-</sup> CD4<sup>+</sup> T cells display analogous phenotypic and functional***  
337 ***differences to their CD8<sup>+</sup> counterparts***

338

339 Despite not forming transcriptionally distinct clusters by scRNAseq, CD4<sup>+</sup> SI T cells  
340 differed in their phenotype, dependent on CD69 and CD103 expression. CD69-  
341 populations expressed lower levels of CD161 and CD127, while CD69<sup>+</sup>CD103<sup>-</sup> CD4<sup>+</sup> T  
342 cells had higher expression of  $\beta$ 2-integrin than either CD69<sup>-</sup> or CD103<sup>+</sup> populations,  
343 analogous to their CD8<sup>+</sup> counterparts (Fig. 5A). Recipient-derived, graft-infiltrating  
344 CD69<sup>+</sup>CD103<sup>-</sup> CD4<sup>+</sup> T cells also displayed higher expression of  $\beta$ 2-integrin than  
345 CD103<sup>+</sup> counterparts (MFI 51,753 vs 30,959, P<0.0001; Fig. 5B).

346

347 A donor-derived regulatory CD4<sup>+</sup> FOXP3<sup>+</sup> population was detected in the  
348 scRNAseq data (Fig. 2C), and donor-derived CD25<sup>+</sup>CD127<sup>-</sup> CD4<sup>+</sup> T cells were  
349 detected by flow cytometry in some subjects, consistent with potential long-term  
350 residency of SI CD4<sup>+</sup> regulatory T cells (Supplementary Fig. 3C). Low cell number of  
351 this population precluded further analysis.

352

353 CD69<sup>+</sup> CD4<sup>+</sup> SI T cells showed higher production of multiple cytokines upon short-  
354 term stimulation compared with CD69<sup>-</sup> T cells (Fig. 5C-I). In particular, IL-17A  
355 production was almost exclusively restricted to CD69<sup>+</sup> T cells (Fig. 5C). CD103<sup>+</sup> CD4<sup>+</sup>  
356 T cells demonstrated higher production of TNF $\alpha$ , CCL4, IL-17A, and IL-10 than CD69<sup>+</sup>  
357 CD103<sup>-</sup> counterparts. There was a similar gradient of functionality between the three  
358 CD4<sup>+</sup> populations, with CD103<sup>+</sup> cells showed greatest polyfunctional cytokine  
359 production (Fig. 5I), as seen in CD8<sup>+</sup> T cells. In summary, CD4<sup>+</sup> SI T cell populations  
360 demonstrated analogous differences in phenotype and functionality to their CD8<sup>+</sup>  
361 counterparts.

362

## 363 ***Discussion***

364

365 This study has identified two transcriptionally distinct states of functionally-resident  
366 *bona fide* human intestinal CD8<sup>+</sup> T<sub>RM</sub> cells, which differ in phenotype and cytokine  
367 production. This was demonstrated using the rigorous approach of identifying donor-  
368 derived populations in the intestinal graft post-transplant, which confirms functional

369 tissue residency. These data were replicated both within graft-infiltrating T cell  
370 populations establishing residency *de novo*, and in the healthy gut. The CD8+ T<sub>RM</sub>  
371 subsets differ in the expression of several genes previously associated with the human  
372 T<sub>RM</sub> signature, which suggests that these signatures, derived from bulk RNAseq data,  
373 may represent an amalgam of transcriptionally distinct T<sub>RM</sub> subsets (Kumar et al., 2017).  
374

375 The two identified CD8+ T<sub>RM</sub> populations differ in IL7R (CD127) expression, and in  
376 IL-2 production, which may indicate differing persistence and proliferation properties, as  
377 well as in the expression of chemokine receptors and integrins, indicating potential  
378 differences in tissue homing and retention. Of particular interest,  $\beta$ 2-integrin is more  
379 highly expressed on CD69+CD103- T<sub>RM</sub> cells, a population which remains difficult to  
380 positively distinguish from recent immigrants from the circulation.  $\beta$ 2-integrin could, in  
381 addition to CD69, represent an important positive marker to identify this population.  
382

383  $\beta$ 2-integrin forms part of the heterodimer LFA-1, which facilitates firm adhesion on  
384 blood vessel endothelium via ICAM-1, a critical stage in lymphocyte trafficking  
385 (Fagerholm et al., 2019).  $\beta$ 2-integrin also regulates the immunological synapse  
386 providing a co-stimulatory signal, both in the interaction with antigen-presenting cells,  
387 and with infected target cells (Liu et al., 2009). LFA-1 is up-regulated on liver-resident T  
388 cells and facilitates their patrolling of hepatic sinusoids, indicating a role for LFA-1 in  
389 T<sub>RM</sub> motility and tissue surveillance (McNamara et al., 2017). Intriguingly, the interaction  
390 of LFA-1 with ICAM-1 reduces cellular responses to TGF $\beta$ , a key cytokine in T<sub>RM</sub>  
391 development (Verma et al., 2012), while TGF $\beta$  can inhibit LFA-1 expression and

392 function (Boutet et al., 2016). This suggests a role for  $\beta$ 2-integrin in the development of  
393 CD103- CD8+ T<sub>RM</sub> cells, which may be TGF $\beta$ -independent, as in mice (Bergsbaken and  
394 Bevan, 2015).

395

396 The *ITGB2* locus is a differentially methylated region in the blood and mucosa in  
397 IBD, and mucosal gene expression is associated with disease activity (Kennedy et al.,  
398 2016; Harris et al., 2014; Román et al., 2013). We hypothesize that this association with  
399 IBD, in which T<sub>RM</sub> cells play a key role (Zundler et al., 2019), could be mediated via  
400 altered  $\beta$ 2-integrin expression and its effects on T<sub>RM</sub> cells, or suggest a pathogenic role  
401 for one of the two T<sub>RM</sub> subsets.

402

403 Single-cell transcriptional heterogeneity has previously been examined in lung T<sub>RM</sub>  
404 cells, with two potential subsets identified, characterised by predominantly different  
405 gene signatures to those in our study (Snyder et al., 2019). However, their putative  
406 subsets contained both CD4+ and CD8+ cells co-clustering, which separated clearly in  
407 our study. T<sub>RM</sub> cell phenotype and behaviour in lung and intestine differ substantially,  
408 and this finding may be driven by such tissue-specific differences, or be an effect of the  
409 higher cell number in our study (Thome et al., 2014). It remains unclear if analogous  
410 subsets to the intestinal populations described in this study exist in other tissues,  
411 whether such subsets differ in residency characteristics and functional capacity, and  
412 whether they play distinct roles in human health and disease.

413

414 In conclusion, we have used the human model of intestinal transplantation to study

415 single-cell heterogeneity in the donor-derived *bona fide* T<sub>RM</sub> intestinal T cells. We found  
416 that CD8<sup>+</sup> T<sub>RM</sub> cells form two transcriptionally, phenotypically, and functionally distinct  
417 subsets, with parallel findings in CD4<sup>+</sup> T cells. In particular, we report the association  
418 between  $\beta$ 2-integrin and CD69<sup>+</sup>CD103<sup>-</sup> intestinal T<sub>RM</sub> cells, which may prove not only a  
419 useful marker for this population, but could also have a role in T<sub>RM</sub> development and  
420 function.

421

422

423

424

425

426

427

428

429

430

431

432

433

434

435

436

437

438 **Materials and methods**

439

440 ***Human biological material***

441 Intestinal transplant recipients were identified via the Oxford University Hospitals  
442 NHS Foundation Trust (OUHFT) transplantation service (Oxford, United Kingdom).  
443 Healthy control study subjects were identified via the OUHFT endoscopy service at the  
444 time of routine endoscopy. Peripheral blood and intestinal biopsies were taken at the  
445 time of endoscopy under the study framework and consent of the Oxford  
446 Gastrointestinal Illnesses Biobank (REC Ref: 16/YH/0247). Patient and sample  
447 characteristics are described in Supplementary Table 1.

448 Small intestinal biopsies were collected at the time of endoscopy and transported in  
449 R10 (RPMI-1640 [Lonza] + 10% FCS [Sigma-Aldrich] + 1% penicillin/streptomycin  
450 [Sigma-Aldrich]), before cryopreservation in freezing medium (10% DMSO [Sigma-  
451 Aldrich], 90% FCS [Sigma-Aldrich]). This method preserves immune cell viability,  
452 surface marker expression, and function (Konnikova et al., 2018). When required,  
453 samples were rapidly thawed in a 37°C water bath, washed in 20ml R10 before tissue  
454 dissociation.

455 Duodenal samples were incubated in R10 media with 1mg/ml Collagenase D  
456 (Roche) and 100µg/ml DNase (Thermo Fisher Scientific) for one hour in a shaking  
457 incubator at 37°C. Biopsies were then dissociated by vigorous agitation using a  
458 GentleMACS Dissociator (Miltenyi Biotec), then strained through a 70µm filter. Cells  
459 were washed with R10 media. For samples undergoing *ex vivo* stimulation or cell  
460 sorting, the mononuclear cells were isolated on a discontinuous 70% and 35% Percoll



461 gradient (GE Healthcare) by centrifugation at 700g for 20 minutes without brake.

462 Mononuclear cells were collected from the interface and washed in R10.

463 For multiplex fluorescence chip cytometry, single intestinal biopsies were embedded  
464 in OCT cryo-embedding matrix (Thermo Fisher Scientific) then frozen in isopentane  
465 (Sigma-Aldrich) suspended over liquid nitrogen, and stored at -80°C until use.

466 Peripheral blood mononuclear cells (PBMCs) were isolated from subject blood  
467 samples by density gradient centrifugation. In brief, blood was diluted 1:1 with PBS,  
468 then layered onto Lymphoprep (Axis-Shield), and centrifuged at 973g for 30 minutes  
469 without brake. The mononuclear layer was collected and washed with R10. Any  
470 remaining red blood cells were lysed with ACK (Ammonium-Chloride-Potassium)  
471 solution for 2-3 minutes, and washed again in R10, before cryopreservation in freezing  
472 medium as above.

473

#### 474 ***Ex vivo stimulation***

475

476 *Ex vivo* stimulation was performed as previously described (Provine et al., 2018). In  
477 brief, purified intestine-derived mononuclear cells were plated at approximately  
478  $1 \times 10^6$ /well in a U-bottom 96-well plate. Cell stimulation cocktail containing phorbol 12-  
479 myristate 13-acetate (PMA) and ionomycin (Biolegend) was added in accordance with  
480 manufacturer's instructions in the presence of brefeldin A and monensin ( both  
481 Biolegend). Cells were incubated at 37°C, 5% CO<sub>2</sub>, for 4 hours.

482

#### 483 ***Flow cytometry and cell sorting***

484

485 For surface marker staining, cells were stained in 50 $\mu$ L of FACS buffer (PBS + 1mM  
486 EDTA + 0.05% BSA) for 30 minutes at 4°C. Surface antibodies and clones used were:  
487 CD3 (OKT3 or UCHT1), V $\delta$ 2 (B6), CD4 (OKT4 or SK3), V $\alpha$ 7.2 (3C10), CD38 (HIT2),  
488 CD103 (Ber-ACT8),  $\gamma\delta$ TCR (11F2), CD69 (FN50), HLA-A2 (BB7.2), HLA-A3 (GAP.A3),  
489 CD8 (SK1 or RPA-T8), CD161 (191B8), nearIR and zombie yellow fixable viability dye  
490 (Thermo Fisher Scientific or Biolegend),  $\beta$ 2 integrin/CD18 (L130), CD25 (2A3), KLRG1  
491 (REA261), CD127 (A019D5), CD7 (M-T701).

492 For intracellular cytokine staining, after surface staining as above, cells were fixed  
493 and permeabilised in 100 $\mu$ L Cytofix/Cytoperm solution for 20 minutes at 4°C (BD  
494 Biosciences). Cells were then washed twice in Perm/Wash buffer (BD Biosciences).  
495 Intracellular staining was performed in 50 $\mu$ L of Perm/Wash buffer (BD Biosciences) for  
496 30 minutes at 4°C using the following antibodies and clones: CCL4 (D21-1351), Ki67  
497 (B56), TNF $\alpha$  (MAb11, IL-17A (BL168), IFN $\gamma$  (B27), IL-2 (MQ1-17H12), GzmK  
498 (GM26E7), IL-10 (JES3-9D7).

499 After staining, cells were stored at 4°C protected from light until data acquisition.  
500 Flow cytometry data were acquired on a BD LSRII flow cytometer (BD BioSciences) or  
501 Aurora spectral flow cytometer (Cytex). For fluorescence-activated cell sorting (FACS)  
502 samples were surface stained as above, with DAPI (Thermo Fisher Scientific) used as  
503 viability dye. FACS was performed on an AriaIII (BD Biosciences; 70 $\mu$ m nozzle).  
504 Antibodies were purchased from BioLegend, BD Biosciences, Miltenyi Biotec, or  
505 Thermo Fisher Scientific.

506

507 ***Flow cytometry data analysis and statistics***

508 Flow cytometry data were analysed using FlowJo version 9.9.5 and version 10.6.1  
509 (FlowJo, LLC). Statistical analyses of flow cytometric data were performed using Prism  
510 version 8 (Graphpad Software). For phenotypic analysis of rare cell subsets,  
511 populations with fewer than 10 cells were excluded.

512

513 ***Chip cytometry***

514 Samples were frozen in OCT (as described above), cryosectioned onto coverslips  
515 and placed in cytometer chips (Zellsafe Tissue chips, Zellkraftwerk, GmbH, Deutscher  
516 Platz 5c, 04103 Leipzig, Germany). Sections were fixed *in situ* at room temperature for  
517 10 minutes using 4% paraformaldehyde, then washed with 10 mL of PBS. Non-specific  
518 binding was blocked by incubating in 5% goat serum (Thermo Fisher Scientific) in PBS  
519 for 1 hour at room temperature. Fluorophore-conjugated antibodies (as above, plus pan-  
520 cytokeratin (C-11, GeneTex), and Histone-H3 (17H2L9, Thermo Fisher Scientific)) were  
521 diluted for staining in PBS. Immunostaining was performed iteratively, with up to three  
522 colours applied simultaneously. Fluorophores were then bleached and additional  
523 antibodies applied to build up the panel (Hennig et al., 2009). Images were acquired  
524 using a Zellscanner One Chip cytometer (Zellkraftwerk) and ZellExplorer software.

525

526 ***10x Genomics library preparation and sequencing***

527

528 scRNAseq libraries were generated using 10x Genomics Chromium Single Cell  
529 V(D)J Reagents Kits (v1 Chemistry) following manufacturer's instructions. Cells were

530 resuspended in PBS with 0.04% BSA at ~1000 cells/ $\mu$ L and loaded onto a single lane of  
531 the Chromium Controller. Captured cell number was 1,774. Library quality and  
532 concentration was determined using a TapeStation (Agilent) and Qubit 2.0 Fluorometer  
533 (Thermo Fisher Scientific). Libraries were sequenced on an Illumina HiSeq 4000 as per  
534 manufacturer's instructions to a mean depth of 63,471 mean reads/cell. Library  
535 generation and sequencing were performed at the Oxford Genomics Centre (Wellcome  
536 Centre for Human Genetics, University of Oxford).

537

### 538 ***Smart-Seq2 library preparation and sequencing***

539

540 Single cells were index-sorted into 96-well plates with one cell per well in 2.3  $\mu$ l lysis  
541 buffer (0.8% (vol/vol) Triton X-100 and 2 U/ $\mu$ L RNase inhibitor). Smart-Seq2 libraries  
542 were generated following the published protocol with External RNA Controls Consortium  
543 (ERCC) RNA (1:100,000) added prior to sequencing (Picelli et al., 2014). cDNA was  
544 pre-amplified by PCR (21 cycles). Libraries were sequenced on an Illumina HiSeq4000  
545 with 75bp paired-end reads. Library generation and sequencing were performed at the  
546 Oxford Genomics Centre (Wellcome Centre for Human Genetics, University of Oxford).

547

### 548 ***Droplet-based (10x Genomics) scRNAseq data analysis***

549

550 FastQ generation, read alignment, barcode counting and UMI counting were  
551 performed using the Cell Ranger pipeline v2.2.0. Downstream processing steps were  
552 performed using Seurat v2.3.4 (Butler et al., 2018; Stuart et al., 2019). Briefly, TCR and

553 BCR genes, and genes expressed in fewer than 10 cells, were removed. Cells with <  
554 3460 UMIs (local minimum of the UMI distribution to the left of the mode UMI count), <  
555 500 genes, and > 10,000 UMIs, > 2500 genes, and/or > 10% mitochondrial reads were  
556 removed (Supplementary Fig. 2A). Variable genes were identified using M3Drop  
557 (Andrews et al., 2018). Data were log normalised and scaled, with cell-cell variation  
558 due to UMI counts, percent mitochondrial reads, and S and G2M cell cycle scores  
559 regressed out. The top 10 principal components (PCs) were used as input for graph-  
560 based clustering (0.4 resolution), as determined by visual inspection of the scree plot.  
561 Clusters were visualised by tSNE. Differential gene expression analysis between  
562 clusters was performed using the Wilcoxon Rank Sum test (FindMarkers function with  
563 default parameters).

564

### 565 ***Plate-based (Smart-Seq2) scRNAseq data analysis***

566

567 Reads were trimmed to remove contaminating adapter and oligo-dT primer  
568 sequences using Trimmomatic v0.36 (Bolger et al., 2014). Trimmed reads were aligned  
569 to the human genome (hg38 assembly) plus added ERCC “spike-in” sequences using  
570 STAR v2.5.3a (--outFilterMismatchNoverLmax 0.04 --outFilterType BySJout --  
571 outMultimapperOrder Random) (Dobin et al., 2012). Alignments were filtered using  
572 Samtools v1.6 (Li et al., 2009) to retain only primary alignments and properly paired  
573 reads. Ensembl gene counts were generated using featureCounts v1.6.0 (-C -B -p)  
574 (Liao et al., 2014). Poor quality cells that fit one or more of the following criteria were  
575 removed from the analysis (Supplementary Fig. 2G-I): small log-library size (< 3 median

576 absolute deviations (MADs) below the median), low percentage of uniquely mapped  
577 reads (< 55%), low gene count (< 3 MADs below the median), high percentage of  
578 ERCCs (> 37.5%), or high mitochondrial read fraction (> 6%). Outlier cells with a large  
579 library size or high gene count (potential doublets) were also removed. Genes with  
580 “undetectable” expression were removed (gene defined as “detectable” if at least 5 read  
581 counts in two cells), along with TCR (and BCR) genes. Log normalised expression  
582 values were generated using the normalize function from scater v1.10.1 (McCarthy et  
583 al., 2017) with cell-specific size factors calculated using scran v1.12.1 (Lun et al., 2016).  
584 Feature selection was performed using M3Drop v3.10.4 (FDR < 0.01) (Andrews et al.,  
585 2018) and the expression matrix subset to retain only the selected genes. Clustering  
586 analysis was performed using SC3 v1.12.0 (Kiselev et al., 2017). Clusters were  
587 visualised by UMAP generated using the top 30 PCs (McInnes et al., 2018) (generated  
588 using the top 30 principal components). Differential gene expression analysis was  
589 performed using DEsingle v1.2.1 (Miao et al., 2018) (FDR < 0.05).

590

591 Upon publication, data will be deposited in the NIH GEO database.

592

593 ***Supplemental material:***

- 594 • Supplemental Figure 1
- 595 • Supplemental Figure 2
- 596 • Supplemental Figure 3
- 597 • Table 1: Subject and sample characteristics
- 598 • Table 2: Differentially expressed gene list

599

600 **Author contribution**

601 MF, NP, LG, PK, and PA conceived and designed the study. Patient identification,  
602 consent, and sample collection was performed by MF, TA, PF, GV, SR, and PA.  
603 Experiments and analyses were performed by MF, NP, LG, KP, AA, SI, and HF. Cell  
604 sorting was performed by HF. MF, NP, and LG created the figures. MF drafted the  
605 article. MF, NP, LG, KP, AA, SI, HF, TA, PF, GV, SR, ES, PK, and PA critically revised  
606 the article and approved the final version.

607

608 **Acknowledgments**

609 We thank the Oxford TGU GI illnesses biobank team, and the clinicians and  
610 endoscopists at Oxford University Hospitals NHS Foundation Trust, for assistance in  
611 patient identification and sample collection. We are grateful to Dr Chris Willberg and  
612 Joachim Hagel at the Peter Medawar Building for work establishing the chip cytometry  
613 facility. We are grateful to Professor Laura Mackay for her advice in the conception of  
614 this project.

615 We thank the Oxford Genomics Centre at the Wellcome Centre for Human Genetics  
616 (funded by Wellcome Trust grant reference 203141/Z/16/Z) for the generation of  
617 sequencing data. The research was funded by the Wellcome Trust (WT 109665MA),  
618 NIHR Senior Fellowship (PK), and National Institute for Health Research (NIHR) Oxford  
619 Biomedical Research Centre (BRC). The authors have no additional financial interests.  
620 The views expressed are those of the author(s) and not necessarily those of the NHS,  
621 the NIHR or the Department of Health.

622

623 **Figure 1. Conventional T cell subsets persist for 5 years post-transplant, and**  
624 **display a characteristic tissue resident memory (T<sub>RM</sub>) phenotype.**

625 (A) Representative flow cytometry plot of HLA-A2 expression of T cells from the  
626 blood, the recipient native intestinal mucosa, and the intestinal transplant graft,  
627 demonstrating identification of donor- and recipient-derived populations by HLA  
628 mismatch.

629 (B) Representative chip cytometry image of intestinal graft mucosa demonstrating  
630 presence of donor-derived (HLA-A2+, yellow arrows) and recipient-derived (HLA-A2-,  
631 white arrows) CD3+ T cells in the lamina propria. Cytokeratin (grey); CD3 (purple); HLA-  
632 A2 (green).

633 (C) Percentage of recipient-origin CD3+ T cells in intestinal grafts, categorised by  
634 time post-transplant (n=37; mean +/- SEM).

635 (D) Percentage of recipient-origin CD3+ T cells in intestinal grafts, categorised by  
636 history of graft rejection. Unfilled circles, no rejection; Black, current rejection; Grey,  
637 previous (post) rejection. (n=37; mean +/- SEM).

638 (E) Flow cytometry plot of HLA-A3 expression of graft-derived T cells in one subject  
639 who demonstrated persistent donor chimerism in the intestinal graft 1865 days (5 years  
640 and 1 month) post-transplant.

641 (F) Percentage of donor-origin CD3+ T cells in the blood of intestinal transplant  
642 recipients, categorised by time post-transplant (n=14; mean +/- SEM). Dashed line at  
643 4% represents the cut-off for significant macrochimerism from prior studies (Fu et al.,  
644 2019; Zuber et al., 2015).



645 (G) Conventional CD8+ and CD4+ T cell subsets in the small intestinal graft as a  
646 proportion of total T cells, categorised by time post-transplant (n=41; mean +/- SEM).

647 (H) The percentage of recipient-derived T cells infiltrating the intestinal graft within  
648 conventional CD8+ and CD4+ T cell subsets, categorised by time post-transplant (n=41;  
649 mean +/- SEM).

650 (I) Unconventional non-V $\delta$ 2+  $\gamma\delta$  T cell, V $\delta$ 2+  $\gamma\delta$  T cell, and V $\alpha$ 7.2+CD161+ CD8+ T  
651 cell (mucosal-associated invariant T cells) subsets in the small intestinal graft as a  
652 proportion of total T cells, categorised by time post-transplant (n=41; mean +/- SEM).

653 (J) The percentage of recipient-derived T cells infiltrating the intestinal graft within  
654 unconventional non-V $\delta$ 2+  $\gamma\delta$  T cell (n=27), V $\delta$ 2+  $\gamma\delta$  T cell (n=25), and V $\alpha$ 7.2+CD161+  
655 CD8+ T cell subsets (20), categorised by time post-transplant (mean +/- SEM).

656 (K) Representative flow cytometry plot of CD69 and CD103 expression on donor-  
657 and recipient-derived CD8+ and CD4+ T cells in the intestinal graft.

658 (L) Percentage of donor- and recipient-derived CD8+ and CD4+ T cells in the  
659 intestinal graft co-expressing CD69 and CD103 categorised by time post-transplant  
660 (n=35; median marked with black line). Blue, CD69-103- cells; Red, CD69+CD103-  
661 cells; Black, CD69+CD103+ cells.

662 For further analysis of surface marker expression, rare populations with fewer than  
663 10 cells were excluded from the analysis (J, L). Statistical analysis performed with 1-  
664 way ANOVA with Dunnett's multiple comparisons test. \*,  $P \leq 0.05$ ; \*\*,  $P \leq 0.01$ .

665

666

667

668 **Figure 2. Transcriptionally distinct tissue resident memory ( $T_{RM}$ ) T cell**  
669 **populations at single cell level, delineated by CD103 expression.**

670 (A) Schematic diagram of two scRNAseq experiments. Biopsies of small intestinal  
671 transplant tissue were collected from subjects at endoscopy, then dissociated to isolate  
672 intestinal lymphocytes. These were sorted by FACS, first with bulk sorting of donor-  
673 derived T cells in Experiment 1, then with index sorting of donor-derived CD103- and  
674 CD103+ T cells in Experiment 2, before scRNAseq library preparation and sequencing  
675 using the 10x Genomics platform (Experiment 1) or the Smart-Seq2 protocol  
676 (Experiment 2).

677 (B) tSNE plot of 974 donor-derived T cells from a single subject showing four  
678 transcriptionally distinct populations of conventional CD4+ and CD8+ T cells.

679 (C) Dot plot of key gene identifiers for the four clusters showing two clusters of CD8+  
680 T cells, and two clusters of CD4+ T cells, including one containing cells expressing  
681 *IL2RA* and *FOXP3*, consistent with a regulatory T cell phenotype. Dot size indicates the  
682 proportion of cells in which the gene is present. Colour intensity indicates the mean  
683 expression level of the gene in cells in that cluster.

684 (D) Heatmap indicating hierarchical clustering of gene expression of CD8+ donor-  
685 derived T cells from population 1 and population 2. Cell labels above indicate cluster:  
686 Red, population 1; Blue, population 2. Genes of interest are highlighted.

687 (E) tSNE plot showing the expression of key genes upregulated in CD8+ population  
688 2 (top row) or upregulated in CD8+ population 1 (bottom row).

689 (F) Dot plot showing the expression of 13 genes previously associated with tissue  
690 residency in human CD69+ T cells (Kumar et al., 2017). Dot size indicates the

691 proportion of cells in which the gene is present. Colour intensity indicates the mean  
692 level of expression of the gene in cells in that cluster.

693 (G) Hierarchical clustering and UMAP plot of 196 index-sorted CD103- and CD103+  
694 CD8+ donor-derived T cells from two subjects identified three transcriptionally distinct  
695 clusters of conventional CD8+ T cells. Cell labels below the dendrogram indicate the  
696 plate used for sorting, the subject, and the CD103 expression determined by index  
697 sorting. For UMAP plot: circles, CD103- cells by index-sorting; triangles, CD103+ cells  
698 by index-sorting; square, unknown CD103 expression by index-sorting.

699 (H) Volcano plot of differential gene expression between cluster 1 and clusters 2 & 3  
700 identified in (G), with genes upregulated (right) or down regulated (left) in clusters 2&3  
701 compared to cluster 1.  $\log_2$ (fold change) is plotted against the FDR-adjusted p-value,  
702 with horizontal dotted line at FDR=0.05. Differentially expressed genes are marked in  
703 blue, with those differentially expressed both Experiments 1 and 2 marked in red.

704 (I) Correlation of  $\log_2$ (fold change) between populations 1 vs 2 from Experiment 1  
705 (10x Genomics, x-axis) and clusters 2&3 vs cluster 1 from Experiment 2 (Smart-Seq2,  
706 y-axis). Blue, genes differentially expressed in both experiments; green, genes  
707 differentially expressed in Experiment 1 only; yellow, genes differentially expressed in  
708 Experiment 2 only; grey, genes not differentially expressed. Genes shown were  
709 expressed in both experiments.

710 (J) Venn diagram showing differentially expressed genes upregulated (red) or  
711 downregulated (blue) in cluster 1 (CD103-) of Experiment 2 (Smart-Eeq2), or CD8+  
712 population 2 of Experiment 1 (10x Genomics). A core gene set of 30 genes that  
713 differentiated the two populations in both experiments are listed.

714

715

716 **Figure 3. Localisation and phenotype of CD103- and CD103+ intestinal T<sub>RM</sub>**

717 **CD8+ populations.**

718 (A) Fluorescence microscopy chip cytometry image of small intestinal transplant  
719 mucosa from a single subject 3 months post-transplant. The donor was HLA-A3+, and  
720 recipient was HLA-A3-. False colour fluorescence imaging for cytokeratin (grey), CD3  
721 (purple), CD8 (red), CD103 (blue), and HLA-A3 (green). Donor-derived CD8+ CD103+  
722 and CD103- cells are indicated by white and yellow arrows respectively.

723 (B,C) Phenotypic analysis of CD8+ T cell populations in healthy small intestine.

724 (B) tSNE representation of CD8+ T cell phenotype from spectral flow cytometry  
725 concatenated from 5 healthy control subjects, with expression of the following markers  
726 superimposed: CD69 and CD103 (first row); CD161, CD7, CD127,  $\beta$ 2-integrin,  
727 granzyme K, KLRG1, and Ki-67 (second row). The location of cells co-expressing CD69  
728 and CD103 is indicated. Blue, CD69-103- cells; Red, CD69+CD103- cells; Black,  
729 CD69+CD103+ cells.

730 (C) Proportion of positive cells (CD161, KLRG1, Ki-67) or MFI (CD7, CD127,  $\beta$ 2-  
731 integrin, granzyme K) of CD8+ T cells, categorised by CD69 and CD103 expression, in  
732 small intestinal biopsies from healthy control subjects (n=10). Mean percentage or MFI  
733 represented by bars. Connecting lines represent populations from the same subject.  
734 Blue, CD69-103- cells; Red, CD69+CD103- cells; Black, CD69+CD103+ cells.

735 (D-J) Phenotypic analysis of recipient-derived CD8+ T cell populations infiltrating the  
736 intestinal transplant graft.

737 (D) The proportion of recipient-derived CD8+ T cells co-expressing CD69 and  
738 CD103 in intestinal transplant grafts, categorised by time post-transplant (n=35). Blue,  
739 CD69-103- cells; Red, CD69+CD103- cells; Black, CD69+CD103+ cells.

740 (E-I) Proportion of CD161+ cells (E), Ki-67+ cells (F) or MFI of CD127 (G), granzyme  
741 K (H), and  $\beta 2$  integrin (I) of recipient-derived CD8+ T cells, categorised by CD69 and  
742 CD103 expression and time post-transplant, in intestinal transplant grafts (n=23). Mean  
743 percentage or MFI represented by bars. Black lines connect populations from the same  
744 sample. Blue, CD69-103- cells; Red, CD69+CD103- cells; Black, CD69+CD103+ cells.

745 (J) Representative histogram of  $\beta 2$  integrin surface expression by circulating,  
746 intestinal CD69-, intestinal CD69+CD103-, and intestinal CD69+CD103+ CD8+ T cells.

747 Statistical analysis performed with one-way ANOVA with Tukey's multiple  
748 comparisons test. \*,  $P \leq 0.05$ ; \*\*,  $P \leq 0.01$ ; \*\*\*,  $P \leq 0.001$ ; \*\*\*\*,  $P \leq 0.0001$ .

749

750

751 **Figure 4. Functional capacity of small intestinal CD8+ T cell populations.**

752 (A-D) Cytokine production by small intestinal CD8+ T cells.

753 Representative histograms of expression, and group summaries of proportion of  
754 CD8+ T cells expressing TNF $\alpha$  (A), IFN $\gamma$  (B), CCL4 (C), and IL-2 (D) after 4-hour  
755 stimulation with PMA and ionomycin in the presence of brefeldin A and monensin,  
756 categorised by CD69 and CD103 expression, in small intestinal biopsies from healthy  
757 control subjects (n=10). Blue, CD69-103- cells; Red, CD69+CD103- cells; Black,  
758 CD69+CD103+ cells.

759 (E) Mean proportion of CD8+ T cells expressing 0, 1, 2, 3, or 4 of the cytokines or

760 chemokines TNF $\alpha$ , IFN $\gamma$ , CCL4, or IL-2, categorised by CD69 and CD103 co-  
761 expression, from small intestinal biopsies from healthy control subjects (n=10).

762 (F) Mean percentage (+/- SEM) of CD8+ T cells co-expressing TNF $\alpha$ , IFN $\gamma$ , CCL4,  
763 or IL-2 production after PMA/ionomycin stimulation as described, categorised by CD69  
764 and CD103 expression. Blue, CD69-103- cells; Red, CD69+CD103- cells; Black,  
765 CD69+CD103+ cells.

766 Statistical analysis performed with one-way ANOVA with Tukey's multiple  
767 comparisons test. \*, P  $\leq$  0.05; \*\*, P  $\leq$  0.01; \*\*\*, P  $\leq$  0.001.

768

769

770 **Figure 5. Phenotype and function of small intestinal CD4+ T cell populations.**

771 (A) MFI (CD161, CD7, CD127,  $\beta$ 2-integrin, granzyme K, and KLRG1) or percentage  
772 positive (Ki67) of CD4+ T cells, categorised by CD69 and CD103 expression, in small  
773 intestinal biopsies from healthy control subjects (n=10). MFI represented by bars.

774 Connecting lines represent populations from the same subject. Blue, CD69-103- cells;  
775 Red, CD69+CD103- cells; Black, CD69+CD103+ cells.

776 (B) MFI of  $\beta$ 2-integrin of recipient-derived CD4+ T cells, categorised by CD69 and  
777 CD103 expression and time post-transplant, in intestinal transplant grafts (n=21). MFI  
778 represented by bars. Blue, CD69-103- cells; Red, CD69+CD103- cells; Black,  
779 CD69+CD103+ cells.

780 (C-I) Cytokine production by small intestinal CD4+ T cells.

781 Representative histograms of expression, and group summaries of proportion of

782 CD4+ T cells expressing IL-17A (C), TNF $\alpha$  (D), IFN $\gamma$  (E), IL-2 (F), CCL-4 (G), and IL-10

783 (H) after 4-hour stimulation with PMA and ionomycin in the presence of brefeldin A and  
784 monensin, categorised by CD69 and CD103 expression, in small intestinal biopsies  
785 from healthy control subjects (n=10). Blue, CD69-103- cells; Red, CD69+CD103- cells;  
786 Black, CD69+CD103+ cells.

787 (I) Mean proportion of CD4+ T cells expressing 0, 1, 2, 3, 4, 5, or 6 of the cytokines  
788 or chemokines IL-17A, TNF $\alpha$ , IFN $\gamma$ , CCL4, IL-2, or IL-10, categorised by CD69 and  
789 CD103 co-expression, from small intestinal biopsies from healthy control subjects  
790 (n=10).

791 Statistical analysis performed with one-way ANOVA with Tukey's multiple  
792 comparisons test. \*, P  $\leq$  0.05; \*\*, P  $\leq$  0.01; \*\*\*, P  $\leq$  0.001.

793

794

### 795 **Supplemental Figure 1.**

796 (A) Illustration demonstrating the principle of HLA allele congenic cell tracking to  
797 identify donor- and recipient-derived T cell populations in the transplanted small  
798 intestinal graft using fluorophore-conjugated antibodies to Class I HLA haplotypes  
799 discordant between donor and recipient.

800 (B) Representative flow cytometry plot of Class I HLA non-specific staining (0.01-  
801 0.12%) from a non-transplant PBMC sample. Gated on Live CD3+ T cells.

802 (C) Representative flow cytometry gating scheme for identification of T cell subsets.

803 (D) Representative histogram of CD161 expression of paired donor- and recipient-  
804 derived CD8+ intestinal T cells.

805 (E) Percentage of CD161+ donor- and recipient-derived CD8+ intestinal T cells

806 categorised by time post-transplant (left), or grouped, with paired samples connected by  
807 black lines (right) (n=15; mean +/- SEM).

808 Statistical analysis performed with Wilcoxon matched-pairs signed rank test. \*,  $P \leq$   
809 0.05.

810

811

812 **Supplemental Figure 2:**

813 (A) Quality control parameters and thresholds for 10x Genomics scRNAseq  
814 Experiment 1. Number of genes per cell (left), number of unique molecular identifiers  
815 (UMIs) per cell (centre), and percentage of mitochondrial reads per cell (right) are  
816 displayed. Each dot represents a single cell, with red and blue lines indicating maximum  
817 and minimum thresholds, respectively.

818 (B) Dot plot showing expression in Experiment 1 of *ITGB2* and its potential  
819 heterodimeric partner, *ITGAL* in Experiment 1. Other potential heterodimeric alpha  
820 integrin partners, *ITGAD*, *ITGAM*, and *ITGAX* were not detected. Dot size indicates the  
821 proportion of cells in which the gene is present. Colour intensity indicates the mean  
822 expression level of the gene.

823 (C) Violin plots showing expression of *ITGB2* and its potential heterodimeric partner  
824 *ITGAL* in Experiment 1. Other potential heterodimeric alpha integrin partners, *ITGAD*,  
825 *ITGAM*, and *ITGAX* were not detected.

826

827 (D) Dot plot showing expression in Experiment 1 of 11 genes previously negatively  
828 associated with tissue residency (downregulated in human CD69+ cells in comparison



829 to CD69- T cells; (Kumar et al., 2017)). Dot size indicates the proportion of cells in  
830 which the gene is present. Colour intensity indicates the mean expression level of the  
831 gene. Other genes in the geneset were not detected in the data (*SBK1*, *NPDC1*,  
832 *KRT72*, *SOX13*, *KRT73*, *TSPAN18*, *PTGDS*).

833 (E) Violin plots showing expression in Experiment 1 of 11 genes previously  
834 negatively associated with tissue residency (downregulated in human CD69+ cells in  
835 comparison to CD69- T cells; (Kumar et al., 2017)).

836 (F) Violin plots showing expression in Experiment 1 of 13 genes previously  
837 associated with tissue residency in human CD69+ T cells (Kumar et al., 2017),  
838 demonstrating discordant expression in conventional T cell clusters.

839 (G-I) Quality control parameters and thresholds for Smart-Seq2 scRNAseq  
840 Experiment 2.

841 (G) Histogram of number of reads per cell and (H) number of genes per cell. Red  
842 and blue lines indicate maximum and minimum thresholds, respectively.

843 (I) Plot showing the percentage of External RNA Controls Consortium (ERCC) spike-  
844 ins per cell against the number of genes per cell. Black line indicates upper threshold.

845 (J) Violin plots showing expression of *ITGB2* and its potential heterodimeric partners  
846 *ITGAL* and *ITGAX* in Experiment 2. *ITGAD* and *ITGAM* were not detected in the data.

847

### 848 **Supplemental Figure 3.**

849 (A) Representative expression of CD161, CD7, CD127 (IL7R), *ITGB2*, and  
850 Granzyme K on CD103- (red) and CD103+ (black) donor-derived T cells from the  
851 intestinal transplant graft.

852 (B) The proportion of CD8<sup>+</sup> T cells co-expressing CD69 and CD103 in small  
853 intestinal biopsies from the duodenum (duo) or ileum from healthy control subjects (n=5  
854 for both duodenum and ileum). Blue, CD69-103<sup>-</sup> cells; Red, CD69+CD103<sup>-</sup> cells; Black,  
855 CD69+CD103<sup>+</sup> cells.

856 (C) Representative flow cytometry gating of CD4<sup>+</sup> CD25<sup>+</sup>CD127<sup>lo</sup> T cells.  
857 Percentage of donor- or recipient-derived intestinal CD4<sup>+</sup> CD25<sup>+</sup>CD127<sup>lo</sup> T cells.  
858 Connecting lines represent populations from the same subject (n=23).

859

860

861

862

## 863 **References**

864 Adachi, T., T. Kobayashi, E. Sugihara, T. Yamada, K. Ikuta, S. Pittaluga, H. Saya, M.  
865 Amagai, and K. Nagao. 2019. Hair follicle-derived IL-7 and IL-15 mediate skin-  
866 resident memory T cell homeostasis and lymphoma. *Nature Medicine*. 1–10.  
867 doi:10.1038/nm.3962.

868 Andrews, T.S., Andrews, T.S., and M. Hemberg. 2018. M3Drop: dropout-based feature  
869 selection for scRNASeq. *Bioinformatics*. 35:2865–2867.  
870 doi:10.1093/bioinformatics/bty1044.

871 Ariotti, S., M.A. Hogenbirk, F.E. Dijkgraaf, L.L. Visser, M.E. Hoekstra, J.-Y. Song, H.  
872 Jacobs, J.B. Haanen, and T.N. Schumacher. 2014. T cell memory. Skin-resident  
873 memory CD8<sup>+</sup> T cells trigger a state of tissue-wide pathogen alert. *Science*.  
874 346:101–105. doi:10.1126/science.1254803.

875 Bartolomé-Casado, R., O.J.B. Landsverk, S.K. Chauhan, L. Richter, D. Phung, V. Greiff,  
876 L.F. Risnes, Y. Yao, R.S. Neumann, S. Yaqub, O. Øyen, R. Horneland, E.M.  
877 Aandahl, V. Paulsen, L.M. Sollid, S.-W. Qiao, E.S. Bækkevold, and F.L. Jahnsen.  
878 2019. Resident memory CD8 T cells persist for years in human small intestine. *J*  
879 *Exp Med*. 157:jem.20190414–23. doi:10.1084/jem.20190414.

880 Bergsbaken, T., and M.J. Bevan. 2015. Proinflammatory microenvironments within the  
881 intestine regulate the differentiation of tissue-resident CD8<sup>+</sup> T cells responding to  
882 infection. *Nat Immunol*. 16:406–414. doi:10.1038/ni.3108.

- 883 Beura, L.K., S. Wijeyesinghe, E.A. Thompson, M.G. Macchietto, P.C. Rosato, M.J.  
884 Pierson, J.M. Schenkel, J.S. Mitchell, V. Vezys, B.T. Fife, S. Shen, and D.  
885 Masopust. 2018. T Cells in Nonlymphoid Tissues Give Rise to Lymph- Node-  
886 Resident Memory T Cells. *Immunity*. 48:327–338.e5.  
887 doi:10.1016/j.immuni.2018.01.015.
- 888 Bolger, A.M., M. Lohse, and B. Usadel. 2014. Trimmomatic: a flexible trimmer for  
889 Illumina sequence data. *Bioinformatics*. 30:2114–2120.  
890 doi:10.1093/bioinformatics/btu170.
- 891 Boutet, M., L. Gauthier, M. Leclerc, G. Gros, V. de Montpreville, N. Théret, E.  
892 Donnadieu, and F. Mami-Chouaib. 2016. TGF $\beta$  Signaling Intersects with CD103  
893 Integrin Signaling to Promote T-Lymphocyte Accumulation and Antitumor Activity in  
894 the Lung Tumor Microenvironment. *Cancer Res*. 76:1757–1769. doi:10.1158/0008-  
895 5472.CAN-15-1545.
- 896 Butler, A., P. Hoffman, P. Smibert, E. Papalexi, and R. Satija. 2018. Integrating single-  
897 cell transcriptomic data across different conditions, technologies, and species. *Nat*  
898 *Biotechnol*. 36:411–420. doi:10.1038/nbt.4096.
- 899 de Leur, K., M. Dieterich, D.A. Hesselink, O.B.J. Corneth, F.J.M.F. Dor, G.N. Graav,  
900 A.M.A. Peeters, A. Mulder, H.J.A.N. Kimenai, F.H.J. Claas, M.C.C.-V. Groningen,  
901 L.J.W. Laan, R.W. Hendriks, and C.C. Baan. 2019. Characterization of donor and  
902 recipient CD8+ tissue-resident memory T cells in transplant nephrectomies. *Sci*  
903 *Rep*. 1–12. doi:10.1038/s41598-019-42401-9.
- 904 Dobin, A., C.A. Davis, F. Schlesinger, J. Drenkow, C. Zaleski, S. Jha, P. Batut, M.  
905 Chaisson, and T.R. Gingeras. 2012. STAR: ultrafast universal RNA-seq aligner.  
906 *Bioinformatics*. 29:15–21. doi:10.1093/bioinformatics/bts635.
- 907 Fagerholm, S.C., C. Guenther, M. Llort Asens, T. Savinko, and L.M. Uotila. 2019.  
908 Beta2-Integrins and Interacting Proteins in Leukocyte Trafficking, Immune  
909 Suppression, and Immunodeficiency Disease. *Front. Immunol*. 10:549–10.  
910 doi:10.3389/fimmu.2019.00254.
- 911 Feau, S., R. Arens, S. Togher, and S.P. Schoenberger. 2011. Autocrine IL-2 is required  
912 for secondary population expansion of CD8+ memory T cells. *Nat Immunol*. 12:908–  
913 913. doi:10.1038/ni.2079.
- 914 Fergusson, J.R., M.H.H.U. hn, L. Swadling, L.J. Walker, A. Kurioka, A. Llibre, A.  
915 Bertoletti, G.H.A. nder, E.W. Newell, M.M. Davis, E.S.-E.O. m, F. Powrie, S.  
916 Capone, A. Folgori, E. Barnes, C.B. Willberg, J.E. Ussher, and P. Klenerman. 2015.  
917 CD161intCD8+ T cells: a novel population of highly functional, memory CD8+ T  
918 cells enriched within the gut. 1–13. doi:10.1038/mi.2015.69.
- 919 Fu, J., J. Zuber, M. Martinez, B. Shonts, A. Obradovic, H. Wang, S.-P. Lau, A. Xia, E.E.  
920 Waffarn, K. Frangaj, T.M. Savage, M.T. Simpson, S. Yang, X.V. Guo, M. Miron, T.  
921 Senda, K. Rogers, A. Rahman, S.-H. Ho, Y. Shen, A. Griesemer, D.L. Farber, T.

- 922 Kato, and M. Sykes. 2019. Human Intestinal Allografts Contain Functional  
923 Hematopoietic Stem and Progenitor Cells that Are Maintained by a Circulating Pool.  
924 *Stem Cell*. 24:227–239.e8. doi:10.1016/j.stem.2018.11.007.
- 925 Gebhardt, T., P.G. Whitney, A. Zaid, L.K. Mackay, A.G. Brooks, W.R. Heath, F.R.  
926 Carbone, and S.N. Mueller. 2011. Different patterns of peripheral migration by  
927 memory CD4+ and CD8+ T cells. *Nature*. 477:216–219. doi:10.1038/nature10339.
- 928 Gutierrez-Arcelus, M., N. Teslovich, A.R. Mola, R.B. Polidoro, A. Nathan, H. Kim, S.  
929 Hannes, K. Slowikowski, G.F.M. Watts, I. Korsunsky, M.B. Brenner, S.  
930 Raychaudhuri, and P.J. Brennan. 2019. Lymphocyte innateness defined by  
931 transcriptional states reflects a balance between proliferation and effector functions.  
932 *Nature Communications*. 1–15. doi:10.1038/s41467-019-08604-4.
- 933 Harris, R.A., D. Nagy-Szakal, S.A. Mir, E. Frank, R. Szigeti, J.L. Kaplan, J. Bronsky, A.  
934 Opekun, G.D. Ferry, H. Winter, and R. Kellermayer. 2014. DNA methylation-  
935 associated colonic mucosal immune and defense responses in treatment-naïve  
936 pediatric ulcerative colitis. *Epigenetics*. 9:1131–1137. doi:10.4161/epi.29446.
- 937 Hennig, C., N. Adams, and G. Hansen. 2009. A versatile platform for comprehensive  
938 chip-based explorative cytometry. *Cytometry*. 75A:362–370.  
939 doi:10.1002/cyto.a.20668.
- 940 Hombrink, P., C. Helbig, R.A. Backer, B. Piet, A.E. Oja, R. Stark, G. Brassler, A.  
941 Jongejan, R.E. Jonkers, B. Nota, O. Basak, H.C. Clevers, P.D. Moerland, D. Amsen,  
942 and R.A.W. van Lier. 2016. Programs for the persistence, vigilance and control of  
943 human CD8+ lung-resident memory T cells. *Nat Immunol*. 17:1467–1478.  
944 doi:10.1038/ni.3589.
- 945 Kennedy, N.A., A.T. Adams, R. Kalla, S. Heath, K.R.O.A. Leary, H. Drummond, D.C.  
946 Wilson, I.G. Gut, E.R. Nimmo, J. Satsangi, G. Lauc, H. Campbell, D.P.B. McGovern,  
947 V. Annesse, V.Z. scaron, I.K. Permberton, M. Wuhrer, D. Kolarich, D.L. Fernandes,  
948 E. Theodorou, V. Merrick, D.I. Spencer, R.A. Gardner, R. Doran, A. Shubhakar, R.  
949 Boyapati, I. Rudan, P. Lionetti, I.T.C.A.C.I. cacute, J.K.S.T. cacute, F.V.C.K. cacute,  
950 J.S. tambuk, M. Novokmet, M.P.C.I.C.B. cacute, O. Gornik, A. Andriulli, L. Cantoro,  
951 G. Sturniolo, G. Fiorino, N. Manetti, A. Latiano, A. Kohn, R.D.R.I. agrave, S.  
952 Danese, I.D. Arnott, C.L. Noble, C.W. Lees, A.G. Shand, G.-T. Ho, M.G. Dunlop, L.  
953 Murphy, J. Gibson, L. Evenden, N. Wrobel, T. Gilchrist, A. Fawkes, G.S.M.  
954 Kammeijer, F. Clerc, N. de Haan, A. Vojta, I.S.Z. ija, D. Markulin, M.K. cacute, P.D.  
955 cacute, Y. Aulchenko, T. van den Heuve, D. Jonkers, M. Pierik, S. Vatn, P. Ricanek,  
956 J.O.R. Jahnsen, P. You, J.S.O. Ivernes, A.B. Frengen, T.M.T.A. s, A.E.F. Moen,  
957 F.A. Dahl, J.C.L.O. m, G.S. Ekeland, T.E. Detlie, A.S.V. Keita, J.D.S.O. derholm, H.  
958 Hjortswang, J. Halfvarson, D. Bergemalm, F.G.O. n, M.D.A. Amato, L.T.O. rkvist, F.  
959 Hjelm, M. Gullberg, N. Nordberg, A. Ocklind, E. Pettersson, D. Ekman, M. Sundell,  
960 E. Modig, A.C.E.M. Veillard, R. Schoemans, et al. 2016. Integrative epigenome-wide  
961 analysis demonstrates that DNA methylation may mediate genetic risk in  
962 inflammatory bowel disease. *Nature Communications*. 7:1–14.

- 963        doi:10.1038/ncomms13507.
- 964        Kiselev, V.Y., K. Kirschner, M.T. Schaub, T. Andrews, A. Yiu, T. Chandra, K.N.  
965        Natarajan, W. Reik, M. Barahona, A.R. Green, and M. Hemberg. 2017. SC3:  
966        consensus clustering of single-cell RNA-seq data. *Nat Meth.* 14:483–486.  
967        doi:10.1038/nmeth.4236.
- 968        Konnikova, L., G. Boschetti, A. Rahman, V. Mitsialis, J. Lord, C. Richmond, V.T. Tomov,  
969        W. Gordon, S. Jelinsky, J. Canavan, A. Liss, S. Wall, M. Field, F. Zhou, J.D.  
970        Goldsmith, M. Bewtra, D.T. Breault, M. Merad, and S.B. Snapper. 2018. High-  
971        dimensional immune phenotyping and transcriptional analyses reveal robust  
972        recovery of viable human immune and epithelial cells from frozen gastrointestinal  
973        tissue. *Mucosal Immunology.* 1–10. doi:10.1038/s41385-018-0047-y.
- 974        Kumar, B.V., W. Ma, M. Miron, T. Granot, R.S. Guyer, D.J. Carpenter, T. Senda, X.  
975        Sun, S.-H. Ho, H. Lerner, A.L. Friedman, Y. Shen, and D.L. Farber. 2017. Human  
976        Tissue-Resident Memory T Cells Are Defined by Core Transcriptional and  
977        Functional Signatures in Lymphoid and Mucosal Sites. *CellReports.* 20:2921–2934.  
978        doi:10.1016/j.celrep.2017.08.078.
- 979        Leng, T., H.D. Akther, C.-P. Hackstein, K. Powell, T. King, M. Friedrich, Z.  
980        Christoforidou, S. McCuaig, M. Neyazi, C.V. Arancibia-Cárcamo, J. Hagel, F.  
981        Powrie, R.S. Peres, V. Millar, D. Ebner, R. Lamichhane, J. Ussher, T.S.C. Hinks, E.  
982        Marchi, C. Willberg, P. Klenerman, and O.I. Investigators3. 2019. TCR and  
983        Inflammatory Signals Tune Human MAIT Cells to Exert Specific Tissue Repair and  
984        Effector Functions. *CellReports.* 28:3077–3091.e5.  
985        doi:10.1016/j.celrep.2019.08.050.
- 986        Li, H., Li, H., B. Handsaker, B. Handsaker, A. Wysoker, A. Wysoker, T. Fennell, T.  
987        Fennell, J. Ruan, J. Ruan, N. Homer, N. Homer, G. Marth, G. Marth, G. Abecasis,  
988        G. Abecasis, R. Durbin, R. Durbin, and 1000 Genome Project Data Processing  
989        Subgroup. 2009. The Sequence Alignment/Map format and SAMtools.  
990        *Bioinformatics.* 25:2078–2079. doi:10.1093/bioinformatics/btp352.
- 991        Liao, Y., Liao, Y., G.K. Smyth, G.K. Smyth, W. Shi, and W. Shi. 2014. featureCounts: an  
992        efficient general purpose program for assigning sequence reads to genomic  
993        features. *Bioinformatics.* 30:923–930. doi:10.1093/bioinformatics/btt656.
- 994        Liu, D., Y.T. Bryceson, T. Meckel, G. Vasiliver-Shamis, M.L. Dustin, and E.O. Long.  
995        2009. Integrin-Dependent Organization and Bidirectional Vesicular Traffic at  
996        Cytotoxic Immune Synapses. *Immunity.* 31:99–109.  
997        doi:10.1016/j.immuni.2009.05.009.
- 998        Lun, A.T.L., D.J. McCarthy, and J.C. Marioni. 2016. A step-by-step workflow for low-  
999        level analysis of single-cell RNA-seq data with Bioconductor. *F1000Res.* 5:2122.  
1000        doi:10.12688/f1000research.9501.2.
- 1001        Mackay, L.K., and A. Kallies. 2017. Transcriptional Regulation of Tissue-Resident



- 1002 Lymphocytes. *Trends in Immunology*. 38:94–103. doi:10.1016/j.it.2016.11.004.
- 1003 Mackay, L.K., M. Minnich, N.A.M. Kragten, Y. Liao, B. Nota, C. Seillet, A. Zaid, K. Man,  
1004 S. Preston, D. Freestone, A. Braun, E. Wynne-Jones, F.M. Behr, R. Stark, D.G.  
1005 Pellicci, D.I. Godfrey, G.T. Belz, M. Pellegrini, T. Gebhardt, M. Busslinger, W. Shi,  
1006 F.R. Carbone, R.A.W. van Lier, A. Kallies, and K.P.J.M. van Gisbergen. 2016. Hobit  
1007 and Blimp1 instruct a universal transcriptional program of tissue residency in  
1008 lymphocytes. *Science*. 352:459–459. doi:10.1126/science.aad2035.
- 1009 Mayassi, T., K. Ladell, H. Gudjonson, J.E. McLaren, D.G. Shaw, M.T. Tran, J.J.  
1010 Rokicka, I. Lawrence, J.-C. Grenier, V. van Unen, C. Ciszewski, M. Dimaano, H.E.  
1011 Sayegh, V. Kumar, C. Wijmenga, P.H.R. Green, R. Gokhale, H. Jericho, C.E.  
1012 Semrad, S. Guandalini, A.R. Dinner, S.S. Kupfer, H.H. Reid, L.B. Barreiro, J.  
1013 Rossjohn, D.A. Price, and B. Jabri. 2019. Chronic Inflammation Permanently  
1014 Reshapes Tissue-Resident Immunity in Celiac Disease. *Cell*. 1–35.  
1015 doi:10.1016/j.cell.2018.12.039.
- 1016 McCarthy, D.J., K.R. Campbell, A.T.L. Lun, and Q.F. Wills. 2017. Scater: pre-  
1017 processing, quality control, normalization and visualization of single-cell RNA-seq  
1018 data in R. *Bioinformatics*. 247:btw777–1186. doi:10.1093/bioinformatics/btw777.
- 1019 McInnes, L., J. Healy, and J. Melville. 2018. UMAP: Uniform Manifold Approximation  
1020 and Projection for Dimension Reduction. arXiv preprint arXiv:1802.03426
- 1021 McNamara, H.A., Y. Cai, M.V. Wagle, Y. Sontani, C.M. Roots, L.A. Miosge, J.H.  
1022 O'Connor, H.J. Sutton, V.V. Ganusov, W.R. Heath, P. Bertolino, C.G. Goodnow, I.A.  
1023 Parish, A. Enders, and I.A. Cockburn. 2017. Up-regulation of LFA-1 allows liver-  
1024 resident memory T cells to patrol and remain in the hepatic sinusoids. *Science*  
1025 *Immunology*. 2:1–11. doi:10.1126/sciimmunol.aaj1996.
- 1026 Miao, Z., K. Deng, X. Wang, and X. Zhang. 2018. DEsingle for detecting three types of  
1027 differential expression in single-cell RNA-seq data. *Bioinformatics*. 34:3223–3224.  
1028 doi:10.1093/bioinformatics/bty332.
- 1029 Oja, A.E., B. Piet, C. Helbig, R. Stark, D. van der Zwan, H. Blaauwgeers, E.B.M.  
1030 Remmerswaal, D. Amsen, R.E. Jonkers, P.D. Moerland, M.A. Nolte, R.A.W. van  
1031 Lier, and P. Hombrink. 2017. Trigger-happy resident memory CD4+ T cells inhabit  
1032 the human lungs. *Mucosal Immunology*. 11:654–667. doi:10.1038/mi.2017.94.
- 1033 Pallett, L.J., J. Davies, E.J. Colbeck, F. Robertson, N. Hansi, N.J.W. Easom, A.R.  
1034 Burton, K.A. Stegmann, A. Schurich, L. Swadling, U.S. Gill, V. Male, T. Luong, A.  
1035 Gander, B.R. Davidson, P.T.F. Kennedy, and M.K. Maini. 2017. IL-2high tissue-  
1036 resident T cells in the human liver: Sentinels for hepatotropic infection. *J Exp Med*.  
1037 214:1567–1580. doi:10.1084/jem.20162115.
- 1038 Park, S.L., T. Gebhardt, and L.K. Mackay. 2019. Tissue-Resident Memory T Cells in  
1039 Cancer Immunosurveillance. *Trends in Immunology*. 1–13.  
1040 doi:10.1016/j.it.2019.06.002.

- 1041 Picelli, S., Å.K. Björklund, O.R. Faridani, S. Sagasser, G. Winberg, and R. Sandberg.  
1042 2013. Smart-seq2 for sensitive full-length transcriptome profiling in single cells. *Nat*  
1043 *Meth.* 10:1096–1098. doi:10.1038/nmeth.2639.
- 1044 Picelli, S., O.R. Faridani, A.S.K.B.O. rklund, G.O.S. Winberg, S. Sagasser, and R.  
1045 Sandberg. 2014. Full-length RNA-seq from single cells using Smart-seq2. *Nat*  
1046 *Protoc.* 9:171–181. doi:10.1038/nprot.2014.006.
- 1047 Provine, N.M., B. Binder, M.E.B. FitzPatrick, A. Schuch, L.C. Garner, K.D. Williamson,  
1048 B. van Wilgenburg, R. Thimme, P. Klenerman, and M. Hofmann. 2018. Unique and  
1049 Common Features of Innate-Like Human V $\delta$ 2+  $\gamma\delta$ T Cells and Mucosal-Associated  
1050 Invariant T Cells. *Front. Immunol.* 9:120–12. doi:10.3389/fimmu.2018.00756.
- 1051 Raeber, M.E., Y. Zurbuchen, D. Impellizzeri, and O. Boyman. 2018. The role of  
1052 cytokines in T-cell memory in health and disease. *Immunol Rev.* 283:176–193.  
1053 doi:10.1111/imr.12644.
- 1054 Román, J., N. Planell, J.J. Lozano, M. Aceituno, M. Esteller, C. Pontes, D. Balsa, M.  
1055 Merlos, J. Panés, and A. Salas. 2013. Evaluation of Responsive Gene Expression  
1056 as a Sensitive and Specific Biomarker in Patients with Ulcerative Colitis. *Inflamm*  
1057 *Bowel Dis.* 19:221–229. doi:10.1002/ibd.23020.
- 1058 Sancho, D., M. Gómez, and F. Sánchez-Madrid. 2005. CD69 is an immunoregulatory  
1059 molecule induced following activation. *Trends in Immunology.* 26:136–140.  
1060 doi:10.1016/j.it.2004.12.006.
- 1061 Schenkel, J.M., K.A. Fraser, L.K. Beura, K.E. Pauken, V. Vezys, and D. Masopust.  
1062 2014. Resident memory CD8 T cells trigger protective innate and adaptive immune  
1063 responses. *Science.* 346:98–101. doi:10.1126/science.1254536.
- 1064 Shiow, L.R., D.B. Rosen, N. Brdičková, Y. Xu, J. An, L.L. Lanier, J.G. Cyster, and M.  
1065 Matloubian. 2006. CD69 acts downstream of interferon- $\alpha/\beta$  to inhibit S1P1 and  
1066 lymphocyte egress from lymphoid organs. *Nature.* 440:540–544.  
1067 doi:10.1038/nature04606.
- 1068 Snyder, M.E., M.O. Finlayson, T.J. Connors, P. Dogra, T. Senda, E. Bush, D.  
1069 Carpenter, C. Marboe, L. Benvenuto, L. Shah, H. Robbins, J.L. Hook, M. Sykes, F.  
1070 D'Ovidio, M. Bacchetta, J.R. Sonett, D.J. Lederer, S. Arcasoy, P.A. Sims, and D.L.  
1071 Farber. 2019. Generation and persistence of human tissue-resident memory T cells  
1072 in lung transplantation. *Science Immunology.* 4:1–17.
- 1073 Stuart, T., A. Butler, P. Hoffman, C. Hafemeister, E. Papalexi, W.M. Mauck, W.M.  
1074 Mauck III, Y. Hao, M. Stoeckius, P. Smibert, and R. Satija. 2019. Comprehensive  
1075 Integration of Single-Cell Data. *Cell.* 177:1888–1902.e21.  
1076 doi:10.1016/j.cell.2019.05.031.
- 1077 Szabo, P.A., M. Miron, and D.L. Farber. 2019. Location, location, location: Tissue  
1078 resident memory T cells in mice and humans. *Science Immunology.* 4:1–12.

- 1079        doi:10.1126/sciimmunol.aas9673.
- 1080        Thome, J.J.C., N. Yudanin, Y. Ohmura, M. Kubota, B. Grinshpun, T. Sathaliyawala, T.  
1081        Kato, H. Lerner, Y. Shen, and D.L. Farber. 2014. Spatial Map of Human T Cell  
1082        Compartmentalization and Maintenance over Decades of Life. *Cell*. 159:814–828.  
1083        doi:10.1016/j.cell.2014.10.026.
- 1084        Verma, N.K., E. Dempsey, A. Long, A. Davies, S.P. Barry, P.G. Fallon, Y. Volkov, and  
1085        D. Kelleher. 2012. Leukocyte Function-associated Antigen-1/Intercellular Adhesion  
1086        Molecule-1 Interaction Induces a Novel Genetic Signature Resulting in T-cells  
1087        Refractory to Transforming Growth Factor- $\beta$  Signaling. *Journal of Biological*  
1088        *Chemistry*. 287:27204–27216. doi:10.1074/jbc.M112.376616.
- 1089        Walsh, D.A., H. Borges da Silva, L.K. Beura, C. Peng, S.E. Hamilton, D. Masopust, and  
1090        S.C. Jameson. 2019. The Functional Requirement for CD69 in Establishment of  
1091        Resident Memory CD8 +T Cells Varies with Tissue Location. *J.I.* 203:946–955.  
1092        doi:10.4049/jimmunol.1900052.
- 1093        Zimmerli, S.C., A. Harari, C. Cellera, F. Vallelian, P.-A. Bart, and G. Pantaleo. 2005.  
1094        HIV-1-specific IFN- $\gamma$ /IL-2-secreting CD8 T cells support CD4-independent  
1095        proliferation of HIV-1-specific CD8 T cells. *Proc. Natl. Acad. Sci. U.S.A.* 102:7239–6.  
1096        doi:10.1073/pnas.0502393102.
- 1097        Zuber, J., B. Shonts, S.P. Lau, A. Obradovic, J. Fu, S. Yang, M. Lambert, S. Coley, J.  
1098        Weiner, J. Thome, S. DeWolf, D.L. Farber, Y. Shen, S. Caillat-Zucman, G. Bhagat,  
1099        A. Griesemer, M. Martinez, T. Kato, and M. Sykes. 2016. Bidirectional intragraft  
1100        alloreactivity drives the repopulation of human intestinal allografts and correlates  
1101        with clinical outcome. *Science Immunology*. 1:eaah3732–eaah3732.  
1102        doi:10.1126/sciimmunol.aah3732.
- 1103        Zuber, J., S. Rosen, B. Shonts, B. Sprangers, T.M. Savage, S. Richman, S. Yang, S.P.  
1104        Lau, S. DeWolf, D. Farber, G. Vlad, E. Zorn, W. Wong, J. Emond, B. Levin, M.  
1105        Martinez, T. Kato, and M. Sykes. 2015. Macrochimerism in Intestinal  
1106        Transplantation: Association With Lower Rejection Rates and Multivisceral  
1107        Transplants, Without GVHD. *American Journal of Transplantation*. 15:2691–2703.  
1108        doi:10.1111/ajt.13325.
- 1109        Zundler, S., E. Becker, M. Spocinska, M. Slawik, L. Parga-Vidal, R. Stark, M. Wiendl, R.  
1110        Atreya, T. Rath, M. Leppkes, K. Hildner, R.X.O.L.X. pez-Posadas, S.X.R. Lukassen,  
1111        A.B. Ekici, C. Neufert, I. Atreya, K.P.J.M. Gisbergen, and M.F. Neurath. 2019. Hobit-  
1112        and Blimp-1-driven CD4+ tissue-resident memory T cells control chronic intestinal  
1113        inflammation. *Nature Immunology*. 20:288-300. doi:10.1038/s41590-018-0298-5.
- 1114



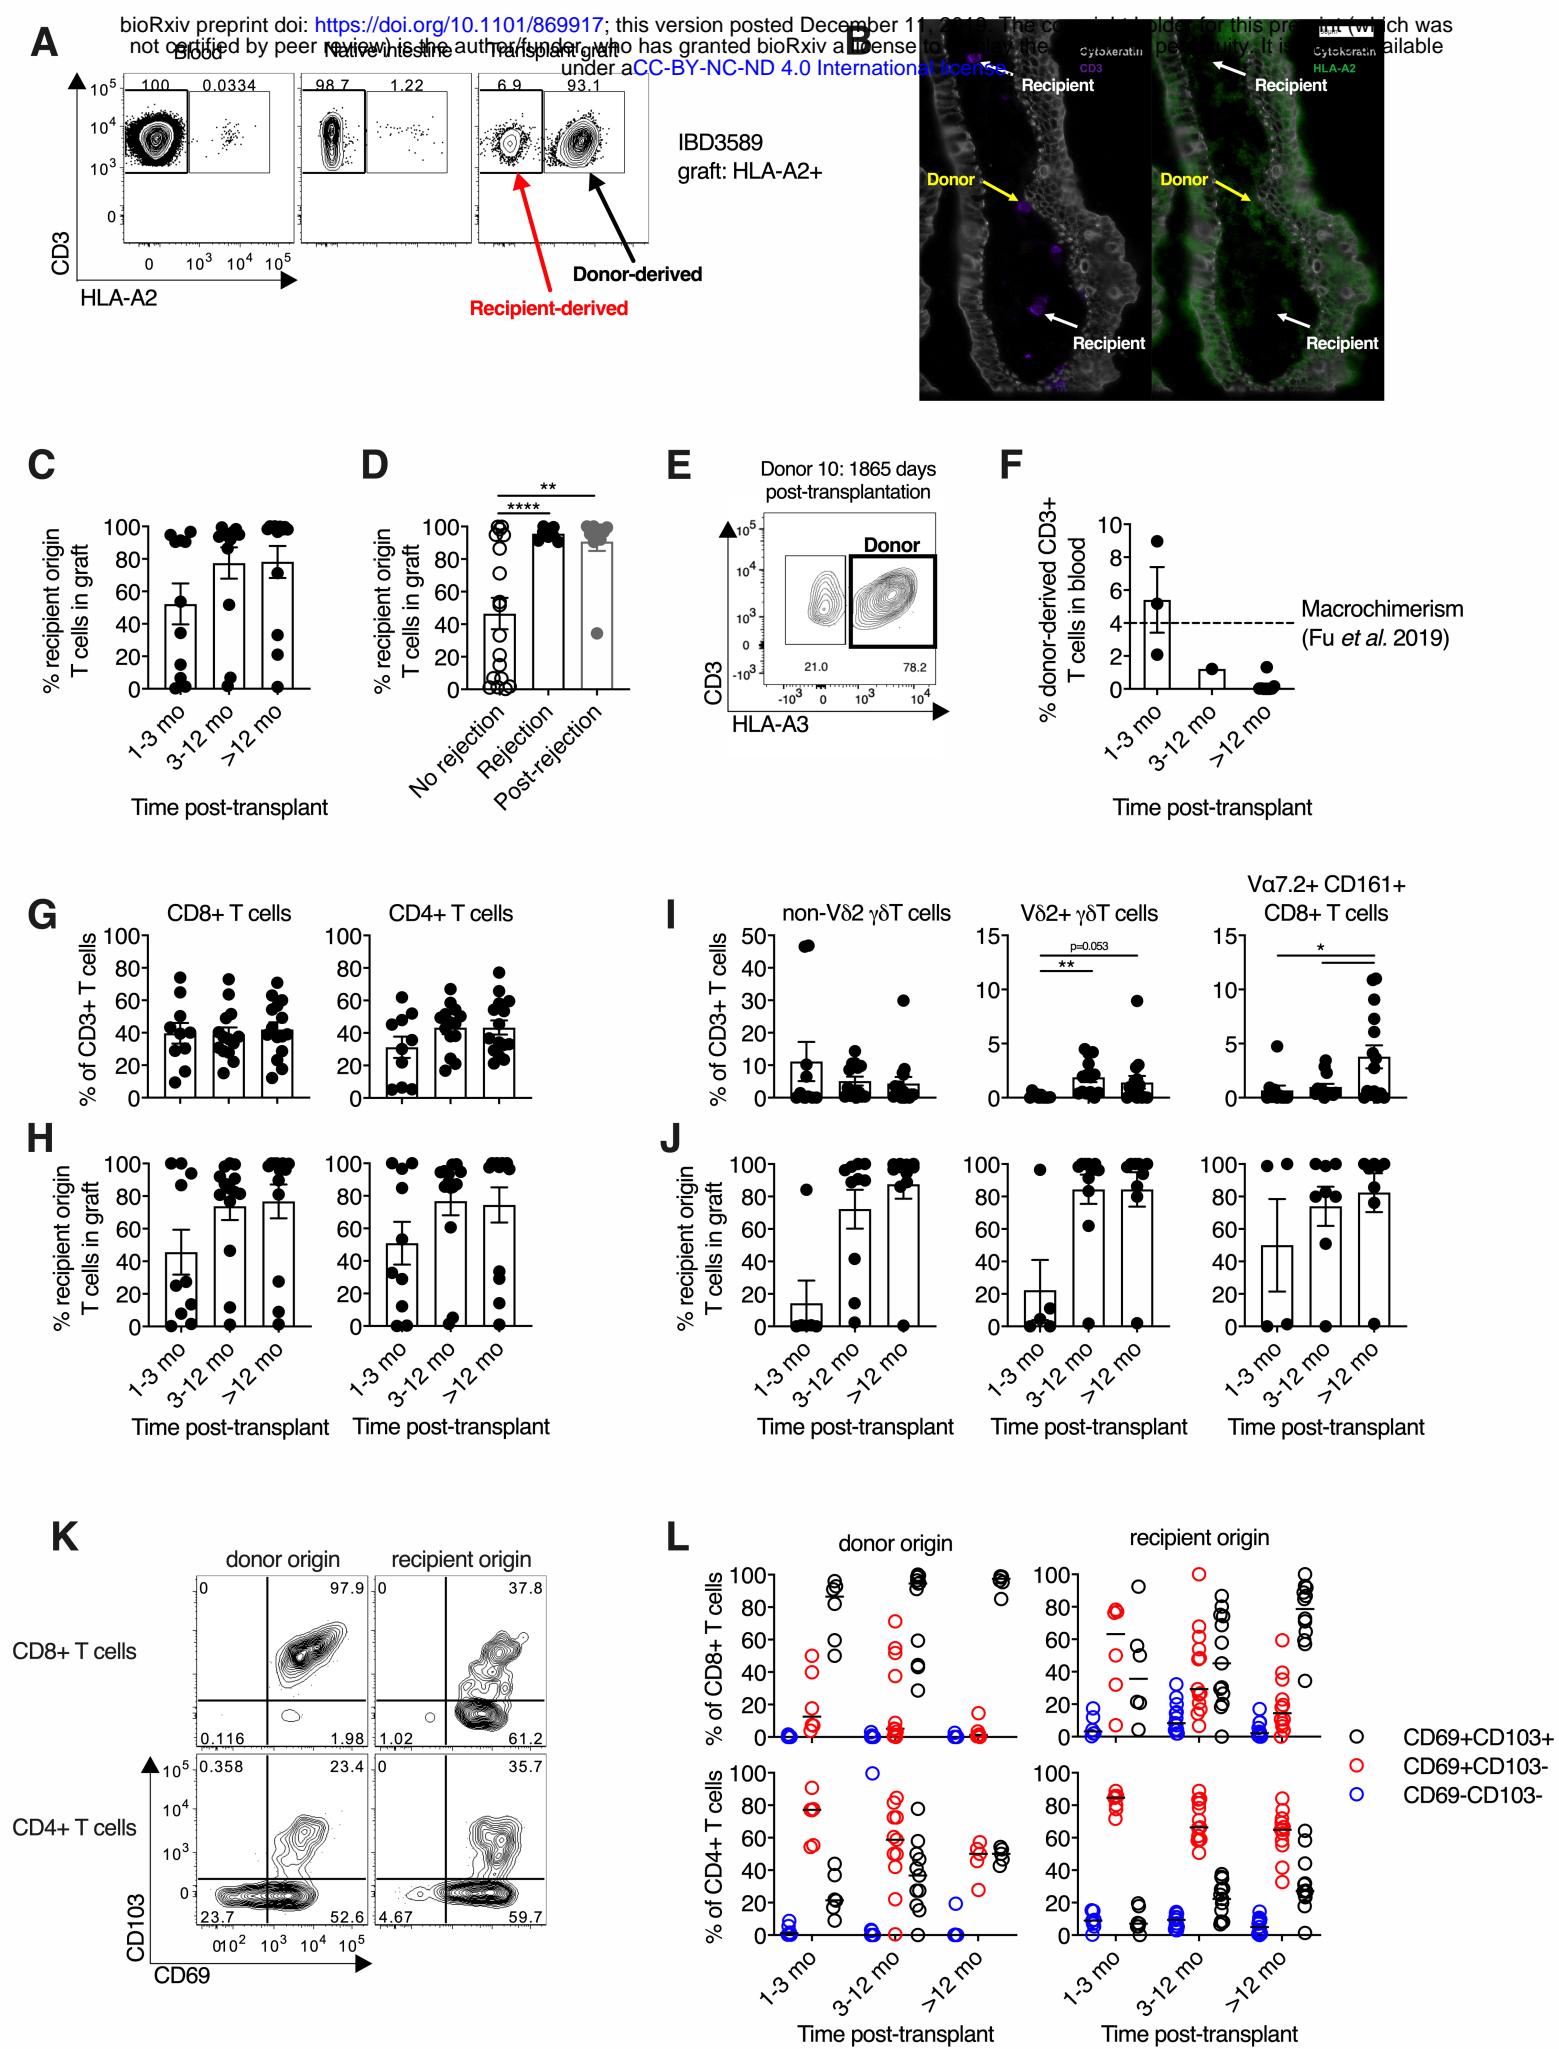

Figure 1

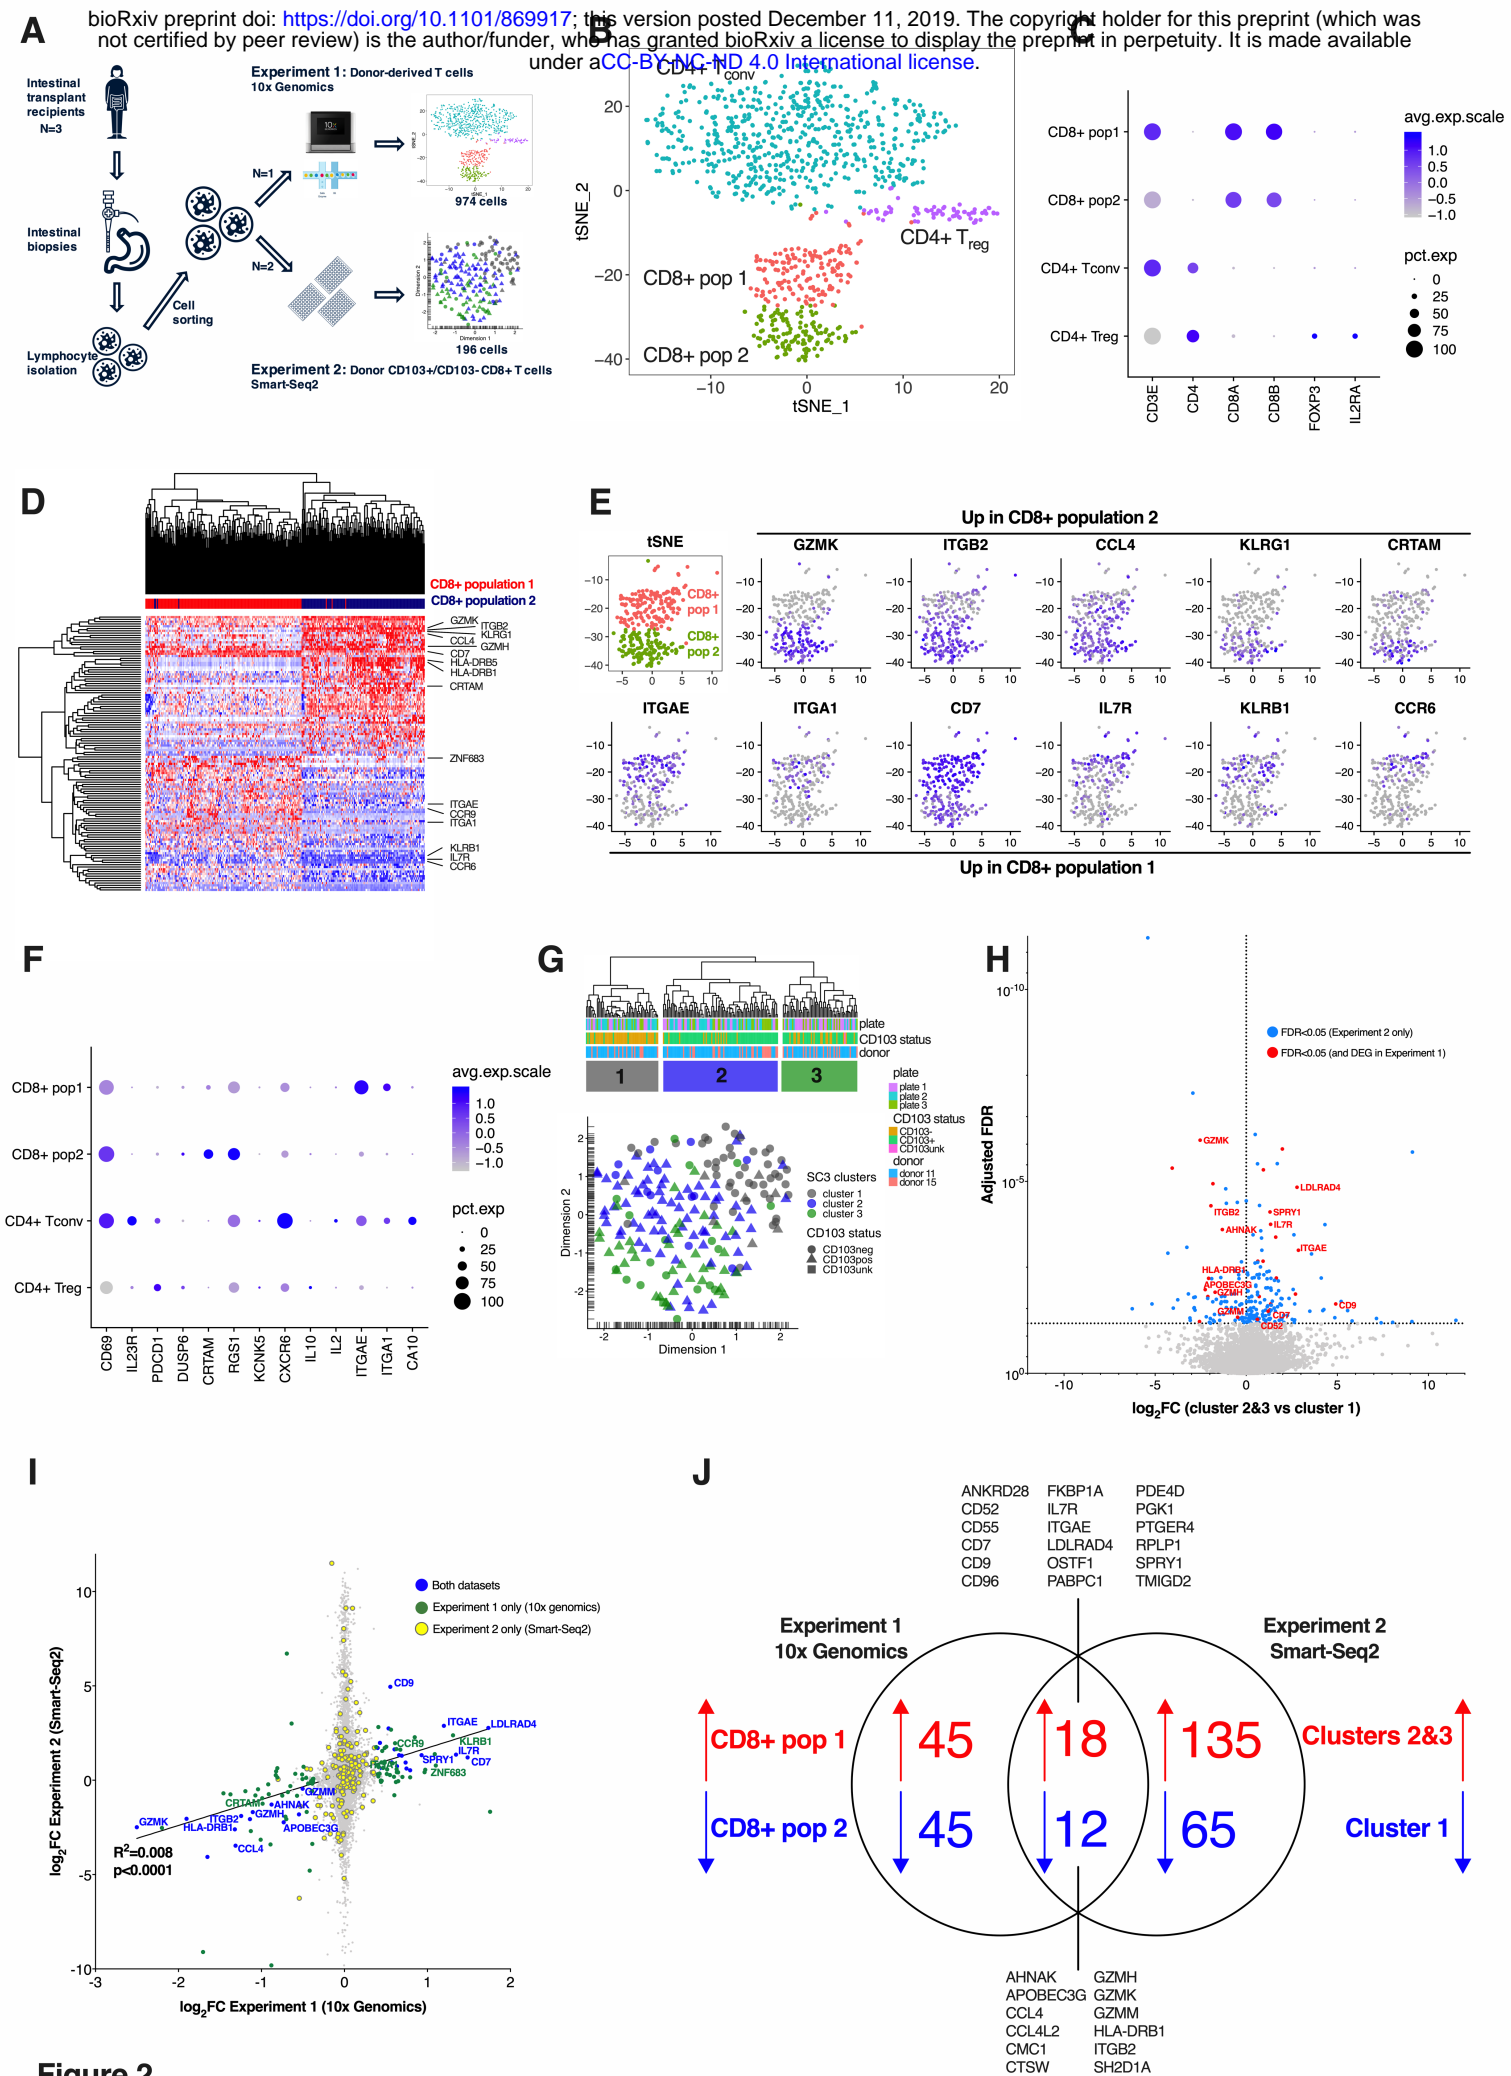

Figure 2

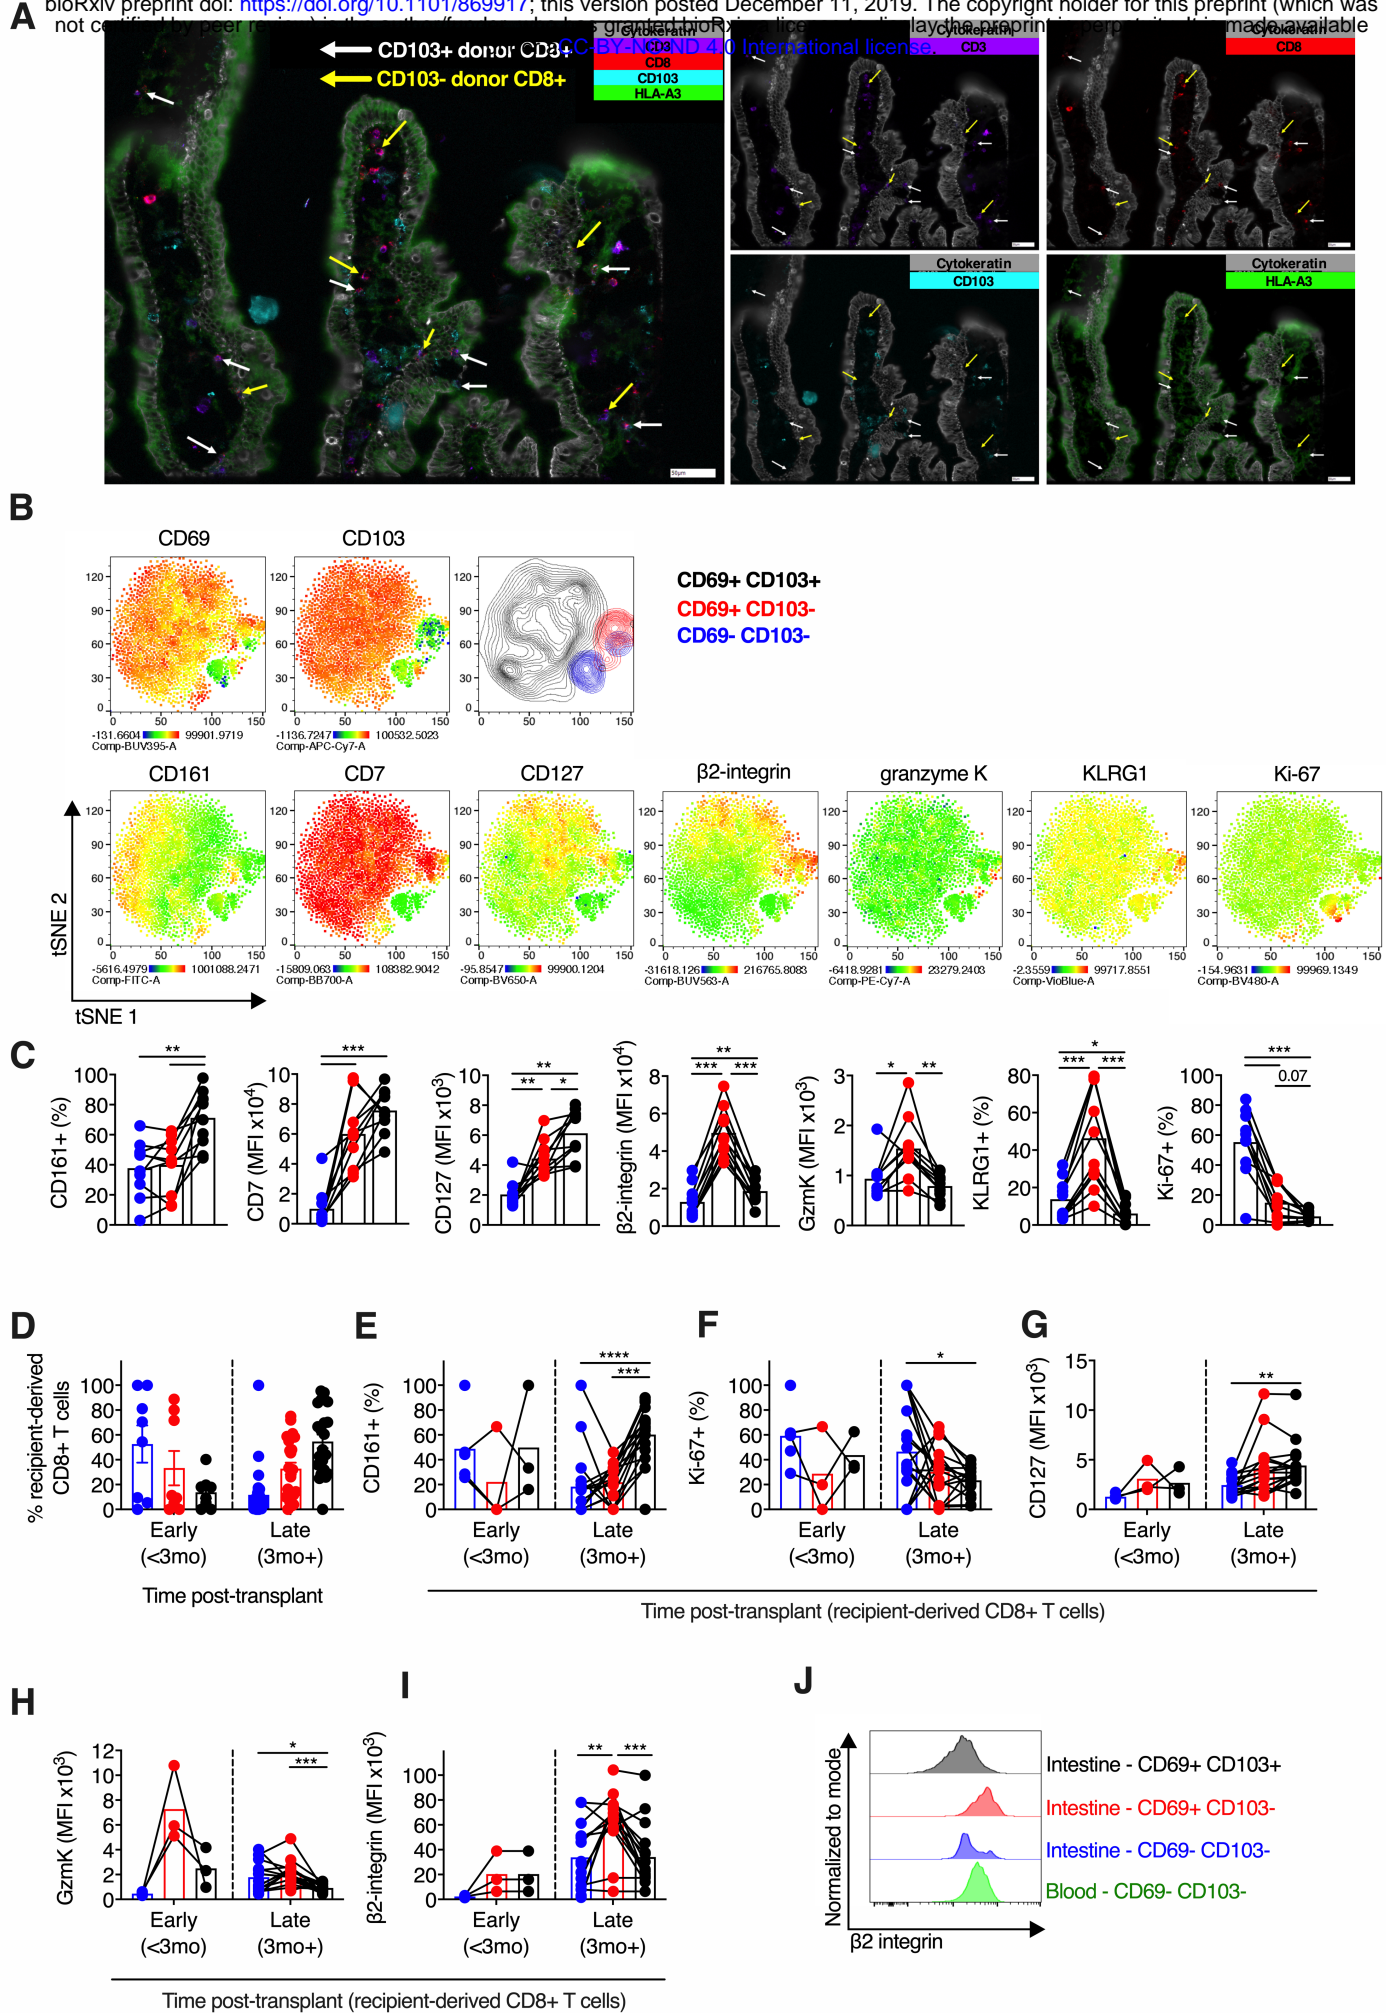

**Figure 3**



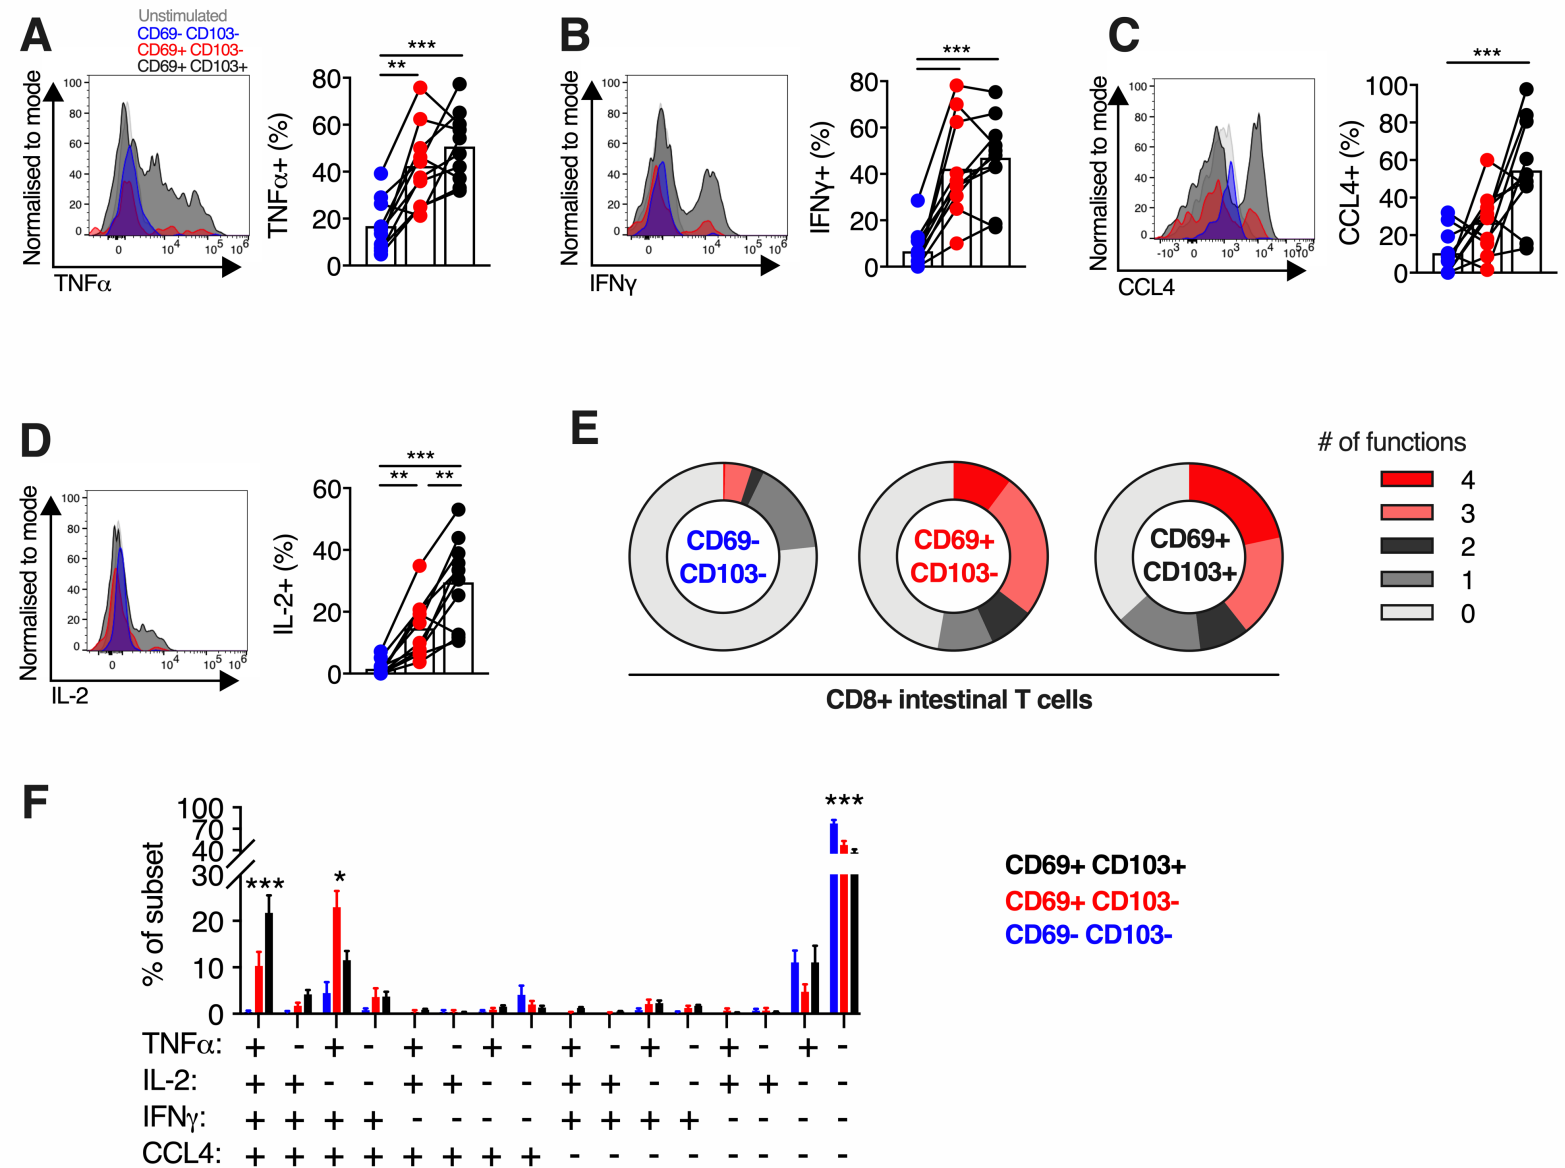

Figure 4

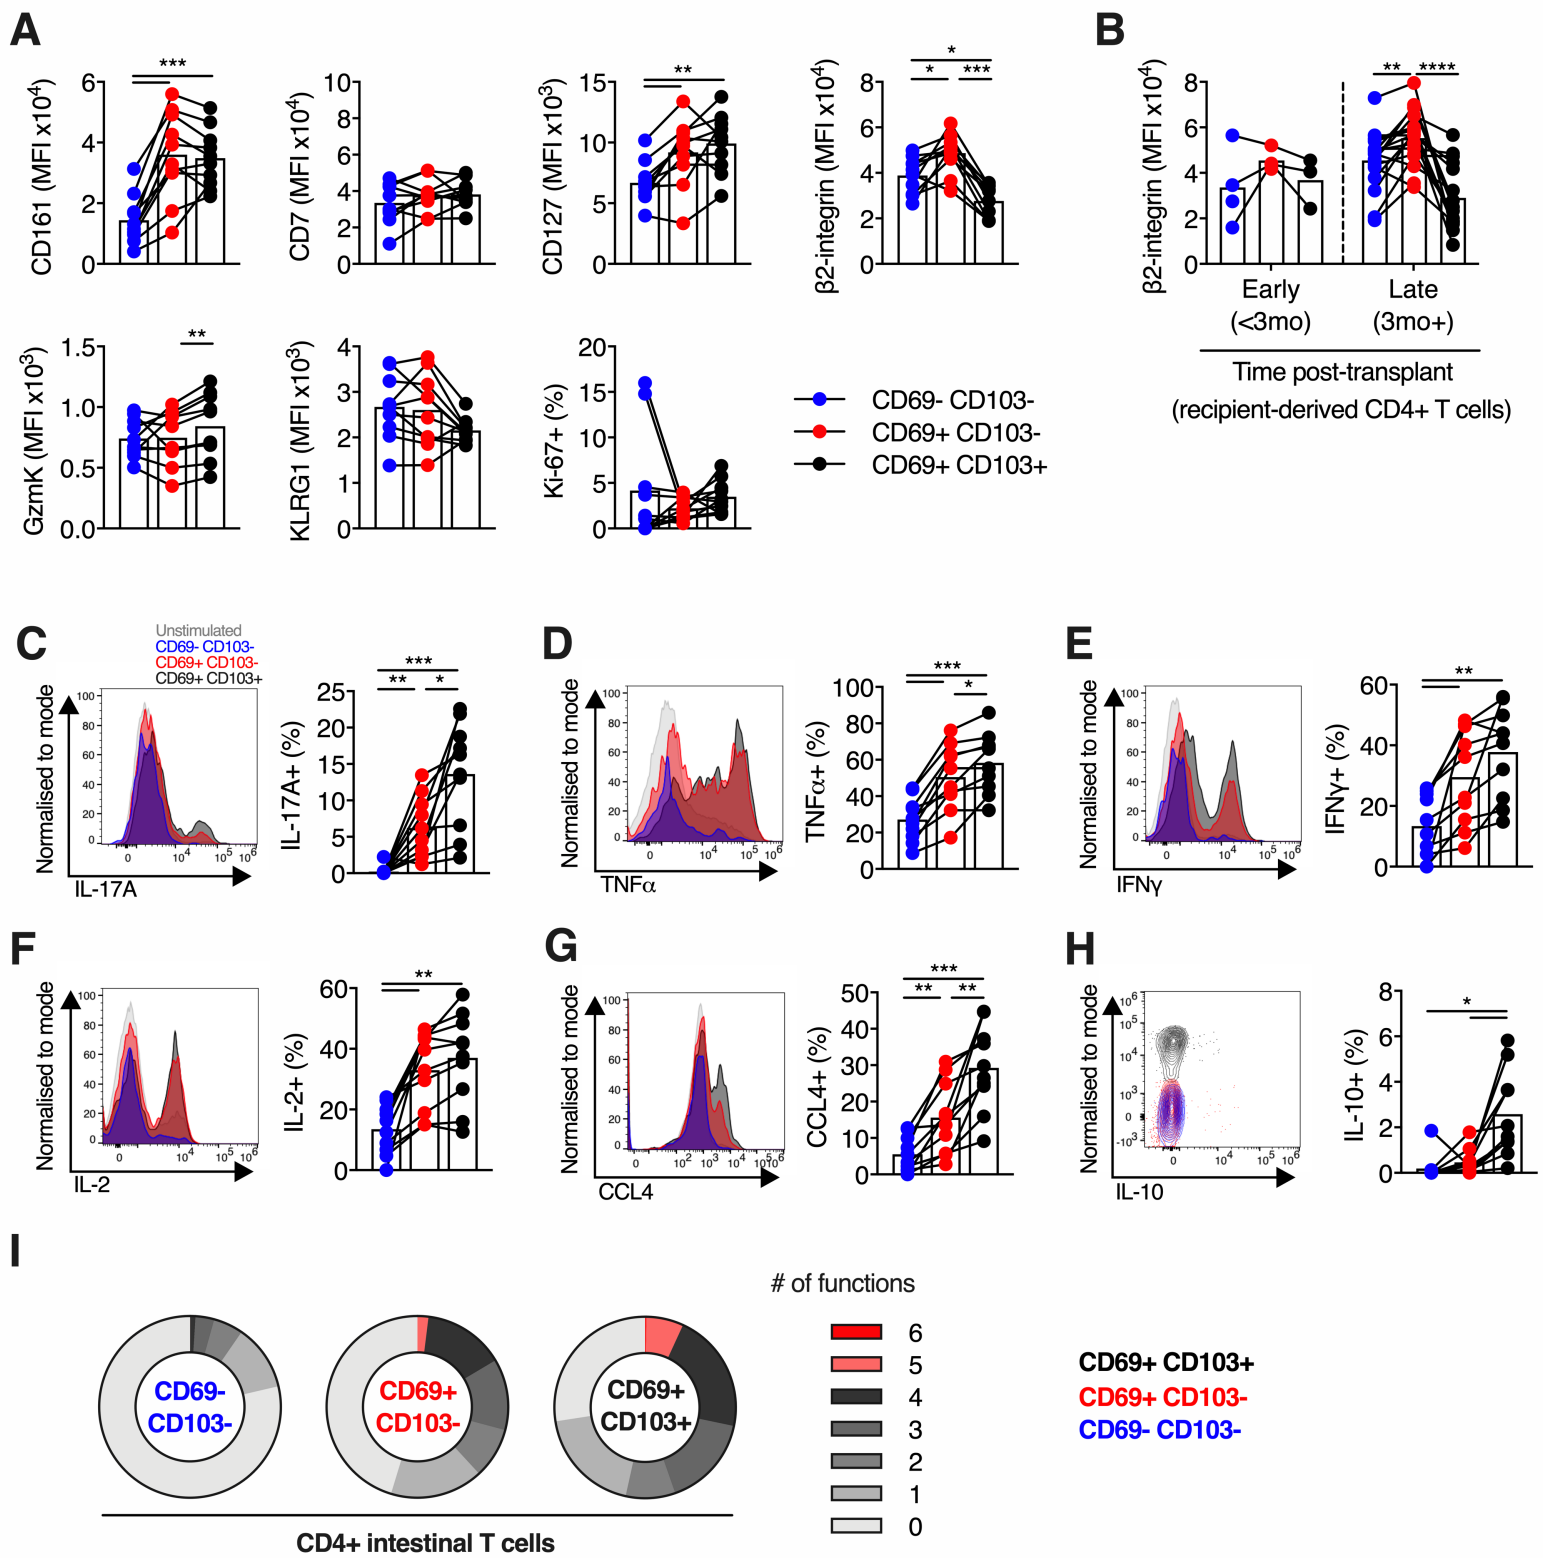

Figure 5
